# Supplementary material for: Molybdenum carbide supported metal catalysts (Mn/MoxC; M = Co, Ni, Cu, Pd, Pt) – metal and surface dependent structure and stability
Source: Royal Society of Chemistry journal article supplement (doi:10.1039/d0cy00504e), 2020-01-01
Supplement: d0cy00504e1.pdf [file d0cy00504e1.pdf]

Electronic Supporting Information

Molybdenum Carbide Supported Metal Catalysts ( $M_n/Mo_xC$ ;  $M = Co, Ni, Cu, Pd, Pt$ ) – Metal and Surface Dependent  
Structure and Stability

Fan Wang,<sup>a</sup> Teng Li,<sup>b</sup> Yun Shi<sup>c\*</sup> and Haijun Jiao<sup>a\*</sup>

a) Leibniz-Institut für Katalyse e.V. an der Universität Rostock, Albert-Einstein-Str. 29a, 18059 Rostock, Germany. b) State Key Laboratory of Coal Conversion, Institute of Coal Chemistry, Chinese Academy of Sciences, Taiyuan, 030001, China. c) School of Chemistry & Chemical Engineering, Linyi University, Linyi 276000, China.

E-mail: shiyun@lyu.edu.cn and haijun.jiao@catalysis.des

Content

- Figure S1.** Structures and adsorption energies of aggregation mode for  $Co_n$  ( $n = 1-15, 25$ ) on  $Mo_2C(001)$  (Co/purple, C/gray, Mo/cyan).  
Page S4
- Figure S2.** Structures and adsorption energies of aggregation mode for  $Ni_n$  ( $n = 1-15, 25$ ) on  $Mo_2C(001)$  (Ni/gray blue, C/gray, Mo/cyan).  
Page S5
- Figure S3.** Structures and adsorption energies of aggregation mode for  $Cu_n$  ( $n = 1-12, 25$ ) on  $Mo_2C(001)$  (Cu/orange, C/gray, Mo/cyan).  
Page S6
- Figure S4.** Most stable adsorption configurations and energies of 3D (side views in square) mode for  $Pd_n$  ( $n = 4, 5$ ) on  $Mo_2C(001)$  (Pd/brown, C/gray, Mo/cyan).  
Page S6
- Figure S5.** Structures and adsorption energies of aggregation mode for  $Pd_n$  ( $n = 1-16$ ) on  $Mo_2C(001)$  (Pd/brown, C/gray, Mo/cyan).  
Page S7
- Figure S6.** Most stable adsorption configurations and energies of 3D (side views in square) mode for  $Pt_n$  ( $n = 4, 5$ ) on  $Mo_2C(001)$  (Pt/blue, C/gray, Mo/cyan).  
Page S8
- Figure S7.** Structures and adsorption energies of aggregation mode for  $Pt_n$  ( $n = 1-16$ ) on  $Mo_2C(001)$  (Pt/blue, C/gray, Mo/cyan).  
Page S8
- Figure S8.** Most stable adsorption configurations and energies for single Co, Ni, Cu, Pd, Pt atoms on  $Mo_2C(101)$  (Co/purple, Ni/gray blue, Cu/orange, Pd/brown, Pt/blue, C/gray, Mo/cyan).  
Page S9
- Figure S9.** Structures of dispersion mode for  $Ni_n$  and  $Cu_n$  ( $n = 1-8$ ) on  $Mo_2C(101)$  (Ni/gray blue, Cu/orange, C/gray, Mo/cyan).  
Page S9
- Figure S10.** Structures and adsorption energies of dispersion and aggregation mode for  $Co_n$ ,  $Ni_n$ , and  $Cu_n$ , ( $n = 2-4$ ) on  $Mo_2C(101)$  (Co/purple, Ni/gray blue, Cu/orange, C/gray, Mo/cyan).  
Page S10
- Figure S11.** Structures (side views in square) and adsorption energies of aggregation mode for  $Co_n$  ( $n = 9-18, 28$ ) on  $Mo_2C(101)$  (Co/purple, C/gray, Mo/cyan).  
Page S11
- Figure S12.** Structures (side views in square) and adsorption energies of aggregation mode for  $Ni_n$  ( $n = 9-18, 28$ ) on  $Mo_2C(101)$  (Ni/gray blue, C/gray, Mo/cyan).  
Page S12
- Figure S13.** Structures (side views in square) and adsorption energies of aggregation mode for  $Cu_n$  ( $n = 9-18, 28$ ) on  $Mo_2C(101)$  (Cu/orange, C/gray, Mo/cyan).  
Page S13
- Figure S14.** Structures of dispersion mode for  $Pt_n$  ( $n = 1-8$ ) on  $Mo_2C(101)$  (Pt/blue, C/gray, Mo/cyan).  
Page S13

**Figure S15.** Structures and adsorption energies of dispersion and aggregation mode for Pd<sub>n</sub> and Pt<sub>n</sub> (*n* = 2-4) on Mo<sub>2</sub>C(101) (Pd/brown, Pt/blue, C/gray, Mo/cyan). Page S14

**Figure S16.** Structures (side views in square) and adsorption energies of aggregation mode for Pd<sub>n</sub> (*n* = 9-16, 24) on Mo<sub>2</sub>C(101) (Pd/brown, C/gray, Mo/cyan). Page S14

**Figure S17.** Structures (side views in square) and adsorption energies of aggregation mode for Pt<sub>n</sub> (*n* = 9-16, 25) on Mo<sub>2</sub>C(101) (Pt/blue, C/gray, Mo/cyan). Page S15

**Figure S18.** Top and side (in square) views of the structures and adsorption energies of aggregation mode for Co<sub>n</sub> (*n* = 1-16) on MoC(001) (Co/purple, C/gray, Mo/cyan). Page S16

**Figure S19.** Top and side (in square) views of the structures and adsorption energies of aggregation mode for Ni<sub>n</sub> (*n* = 1-16) on MoC(001) (Ni/gray blue, C/gray, Mo/cyan). Page S17

**Figure S20.** Top and side (in square) views of the structures and adsorption energies of aggregation mode for Cu<sub>n</sub> (*n* = 1-15) on MoC(001) (Cu/orange, C/gray, Mo/cyan). Page S18

**Figure S21.** Top and side (in square) views of structures and adsorption energies of aggregation mode for Pd<sub>n</sub> (*n* = 1-13) on MoC(001) (Pd/brown, C/gray, Mo/cyan). Page S19

**Figure S22.** Top and side (in square) views of structures and adsorption energies of aggregation mode for Pt<sub>n</sub> (*n* = 1-14) on MoC(001) (Pt/blue, C/gray, Mo/cyan). Page S20

**Table S1.** Average aggregation energy [ $E_{agg}(M_{gas})$ , eV], stepwise growth energy [ $E_{growth}(M_{gas})$ , eV], average M-M distance (*R*, Å) and average magnetic moment (*M*, μ<sub>B</sub>) of M<sub>n</sub> clusters in gas phase (M = Co, Ni, Cu, Pd, Pt). Page S21

**Table S2.** Possible adsorption site, optimized adsorption site and adsorption energy (eV) for single Co, Ni, Cu, Pd, Pt atoms on Mo<sub>2</sub>C(001), Mo<sub>2</sub>C(101) and MoC(001). Page S22

**Table S3.** Adsorption energy [ $E(Co_{n/ads})$ ; eV], average adsorption energy [ $E(Co_{ads/av})$ ; eV], stepwise adsorption energy [ $\Delta E(Co_{ads})$ ; eV], average aggregation energy [ $E_{agg}(Co_{ads})$ ; eV], stepwise growth energy [ $E_{growth}(Co_{ads})$ ; eV], coordination number (CN) with surface Mo atoms, number of Co-Co bond (NB-Co), average Co-Co distance (*d*, Å), and average Bader charge (*q*, e) for Co<sub>n</sub> on Mo<sub>2</sub>C(001). Page S23

**Table S4.** Adsorption energy [ $E(Ni_{n/ads})$ ; eV], average adsorption energy [ $E(Ni_{ads/av})$ ; eV], stepwise adsorption energy [ $\Delta E(Ni_{ads})$ ; eV], average aggregation energy [ $E_{agg}(Ni_{ads})$ ; eV], stepwise growth energy [ $E_{growth}(Ni_{ads})$ ; eV], coordination number (CN) with surface Mo atoms, number of Ni-Ni bond (NB-Ni), average Ni-Ni distance (*d*, Å), and average Bader charge (*q*, e) for Ni<sub>n</sub> on Mo<sub>2</sub>C(001). Page S24

**Table S5.** Adsorption energy [ $E(Cu_{n/ads})$ ; eV] (values in parentheses corrected by D3 method), average adsorption energy [ $E(Cu_{ads/av})$ ; eV], stepwise adsorption energy [ $\Delta E(Cu_{ads})$ ; eV], average aggregation energy [ $E_{agg}(Cu_{ads})$ ; eV], stepwise growth energy [ $E_{growth}(Cu_{ads})$ ; eV], coordination number (CN) with surface Mo atoms, number of Cu-Cu bond (NB-Cu), average Cu-Cu distance (*d*, Å), and average Bader charge (*q*, e) for Cu<sub>n</sub> on Mo<sub>2</sub>C(001). Page S25

**Table S6.** Adsorption energy [ $E(Pd_{n/ads})$ ; eV], average adsorption energy [ $E(Pd_{ads/av})$ ; eV], stepwise adsorption energy [ $\Delta E(Pd_{ads})$ ; eV], average aggregation energy [ $E_{agg}(Pd_{ads})$ ; eV], stepwise growth energy [ $E_{growth}(Pd_{ads})$ ; eV], coordination number (CN) with surface Mo atoms, number of Pd-Pd bond (NB-Pd), average Pd-Pd distance (*d*, Å), and average Bader charge (*q*, e) for Pd<sub>n</sub> on Mo<sub>2</sub>C(001). Page S26

**Table S7.** Adsorption energy [ $E(Pt_{n/ads})$ ; eV] (values in parentheses corrected by D3 method), average adsorption energy [ $E(Pt_{ads/av})$ ; eV], stepwise adsorption energy [ $\Delta E(Pt_{ads})$ ; eV], average aggregation energy [ $E_{agg}(Pt_{ads})$ ; eV], stepwise growth energy [ $E_{growth}(Pt_{ads})$ ; eV], coordination number (CN) with surface Mo atoms, number of Pt-Pt bond (NB-Pt), average Pt-Pt distance (*d*, Å), and average Bader charge (*q*, e) for Pt<sub>n</sub> on Mo<sub>2</sub>C(001). Page S27

**Table S8.** Adsorption energy [ $E(Co_{n/ads})$ ; eV], average adsorption energy [ $E(Co_{ads/av})$ ; eV], stepwise adsorption energy [ $\Delta E(Co_{ads})$ ; eV], average aggregation energy [ $E_{agg}(Co_{ads})$ ; eV], stepwise growth energy [ $E_{growth}(Co_{ads})$ ; eV], coordination number (CN) with surface Mo and C atoms, number of Co-Co bond (NB-Co), average Co-Co distance (*d*, Å), and average Bader charge (*q*, e) for Co<sub>n</sub> on Mo<sub>2</sub>C(101). Page S28

**Table S9.** Adsorption energy [ $E(Ni_{n/ads})$ ; eV], average adsorption energy [ $E(Ni_{ads/av})$ ; eV], stepwise adsorption energy [ $\Delta E(Ni_{ads})$ ; eV], average aggregation energy [ $E_{agg}(Ni_{ads})$ ; eV], stepwise growth energy [ $E_{growth}(Ni_{ads})$ ; eV], coordination number (CN) with surface Mo and C atoms, number of Ni-Ni bond (NB-Ni), average Ni-Ni distance (*d*, Å), and average Bader charge (*q*, e) for Ni<sub>n</sub> on Mo<sub>2</sub>C(101). Page S29

**Table S10.** Adsorption energy [ $E(Cu_{n/ads})$ ; eV] (values in parentheses corrected by D3 method), average adsorption energy [ $E(Cu_{ads/av})$ ; eV], stepwise adsorption energy [ $\Delta E(Cu_{ads})$ ; eV], average aggregation energy [ $E_{agg}(Cu_{ads})$ ; eV], stepwise growth energy [ $E_{growth}(Cu_{ads})$ ; eV], coordination number (CN) with surface Mo and C atoms, number of Cu-Cu bond (NB-Cu), average Cu-Cu distance (*d*, Å), and average Bader charge (*q*, e) for Cu<sub>n</sub> on Mo<sub>2</sub>C(101). Page S30

**Table S11.** Adsorption energy [ $E(Pd_{n/ads})$ ; eV], average adsorption energy [ $E(Pd_{ads/av})$ ; eV], stepwise adsorption energy [ $\Delta E(Pd_{ads})$ ; eV], average aggregation energy [ $E_{agg}(Pd_{ads})$ ; eV], stepwise growth energy [ $E_{growth}(Pd_{ads})$ ; eV], coordination number (CN) with surface Mo and C atoms, number of Pd-Pd bond (NB-Pd), average Pd-Pd distance (*d*, Å), and average Bader charge (*q*, e) for Pd<sub>n</sub> on Mo<sub>2</sub>C(101). Page S31

**Table S12.** Adsorption energy [ $E(\text{Pt}_{n/\text{ads}})$ ; eV] (values in parentheses corrected by D3 method), average adsorption energy [ $E(\text{Pt}_{\text{ads}/\text{av}})$ ; eV], stepwise adsorption energy [ $\Delta E(\text{Pt}_{\text{ads}})$ ; eV], average aggregation energy [ $E_{\text{agg}}(\text{Pt}_{\text{ads}})$ ; eV], stepwise growth energy [ $E_{\text{growth}}(\text{Pt}_{\text{ads}})$ ; eV], coordination number (CN) with surface Mo and C atoms, number of Pt-Pt bond (NB-Pt), average Pt-Pt distance ( $d$ , Å), and average Bader charge ( $q$ , e) for  $\text{Pt}_n$  on  $\text{Mo}_2\text{C}(101)$ .

Page S32

**Table S13.** Adsorption energy [ $E(\text{Co}_{n/\text{ads}})$ ; eV], average adsorption energy [ $E(\text{Co}_{\text{ads}/\text{av}})$ ; eV], stepwise adsorption energy [ $\Delta E(\text{Co}_{\text{ads}})$ ; eV], average aggregation energy [ $E_{\text{agg}}(\text{Co}_{\text{ads}})$ ; eV], stepwise growth energy [ $E_{\text{growth}}(\text{Co}_{\text{ads}})$ ; eV], coordination number (CN) with surface Mo and C atoms, number of Co-Co bond (NB-Co), average Co-Co distance ( $d$ , Å), and average Bader charge ( $q$ , e) for  $\text{Co}_n$  on  $\text{MoC}(001)$ .

Page S33

**Table S14.** Adsorption energy [ $E(\text{Ni}_{n/\text{ads}})$ ; eV], average adsorption energy [ $E(\text{Ni}_{\text{ads}/\text{av}})$ ; eV], stepwise adsorption energy [ $\Delta E(\text{Ni}_{\text{ads}})$ ; eV], average aggregation energy [ $E_{\text{agg}}(\text{Ni}_{\text{ads}})$ ; eV], stepwise growth energy [ $E_{\text{growth}}(\text{Ni}_{\text{ads}})$ ; eV], coordination number (CN) with surface Mo and C atoms, number of Ni-Ni bond (NB-Ni), average Ni-Ni distance ( $d$ , Å), and average Bader charge ( $q$ , e) for  $\text{Ni}_n$  on  $\text{MoC}(001)$ .

Page S34

**Table S15.** Adsorption energy [ $E(\text{Cu}_{n/\text{ads}})$ ; eV] (values in parentheses corrected by D3 method), average adsorption energy [ $E(\text{Cu}_{\text{ads}/\text{av}})$ ; eV], stepwise adsorption energy [ $\Delta E(\text{Cu}_{\text{ads}})$ ; eV], average aggregation energy [ $E_{\text{agg}}(\text{Cu}_{\text{ads}})$ ; eV], stepwise growth energy [ $E_{\text{growth}}(\text{Cu}_{\text{ads}})$ ; eV], coordination number (CN) with surface Mo and C atoms, number of Cu-Cu bond (NB-Cu), average Cu-Cu distance ( $d$ , Å), and average Bader charge ( $q$ , e) for  $\text{Cu}_n$  on  $\text{MoC}(001)$ .

Page S35

**Table S16.** Adsorption energy [ $E(\text{Pd}_{n/\text{ads}})$ ; eV], average adsorption energy [ $E(\text{Pd}_{\text{ads}/\text{av}})$ ; eV], stepwise adsorption energy [ $\Delta E(\text{Pd}_{\text{ads}})$ ; eV], average aggregation energy [ $E_{\text{agg}}(\text{Pd}_{\text{ads}})$ ; eV], stepwise growth energy [ $E_{\text{growth}}(\text{Pd}_{\text{ads}})$ ; eV], coordination number (CN) with surface Mo and C atoms, number of Pd-Pd bond (NB-Pd), average Pd-Pd distance ( $d$ , Å), and average Bader charge ( $q$ , e) for  $\text{Pd}_n$  on  $\text{MoC}(001)$ .

Page S36

**Table S17.** Adsorption energy [ $E(\text{Pt}_{n/\text{ads}})$ ; eV] (values in parentheses corrected by D3 method), average adsorption energy [ $E(\text{Pt}_{\text{ads}/\text{av}})$ ; eV], stepwise adsorption energy [ $\Delta E(\text{Pt}_{\text{ads}})$ ; eV], average aggregation energy [ $E_{\text{agg}}(\text{Pt}_{\text{ads}})$ ; eV], stepwise growth energy [ $E_{\text{growth}}(\text{Pt}_{\text{ads}})$ ; eV], coordination number (CN) with surface Mo and C atoms, number of Pt-Pt bond (NB-Pt), average Pt-Pt distance ( $d$ , Å), and average Bader charge ( $q$ , e) for  $\text{Pt}_n$  on  $\text{MoC}(001)$ .

Page S37

**Table S18.** Comparison of lattice constants of  $\text{Mo}_x\text{C}_y$  and bulk metals.

Page

S37



**Figure S1.** Structures and adsorption energies of aggregation mode for  $\text{Co}_n$  ( $n = 1-15, 25$ ) on  $\text{Mo}_2\text{C}(001)$  (Co/purple, C/gray, Mo/cyan).



**Figure S2.** Structures and adsorption energies of aggregation mode for  $Ni_n$  ( $n = 1-15, 25$ ) on  $Mo_2C(001)$  (Ni/gray blue, C/gray, Mo/cyan).



**Figure S3.** Structures and adsorption energies of aggregation mode for  $\text{Cu}_n$  ( $n = 1-12, 25$ ) on  $\text{Mo}_2\text{C}(001)$  (Cu/orange, C/gray, Mo/cyan).



**Figure S4.** Most stable adsorption configurations and energies of 3D (side views in square) mode for  $\text{Pd}_n$  ( $n = 4, 5$ ) on  $\text{Mo}_2\text{C}(001)$  (Pd/brown, C/gray, Mo/cyan).



**Figure S5.** Structures and adsorption energies of aggregation mode for Pd<sub>n</sub> ( $n = 1-16$ ) on Mo<sub>2</sub>C(001) (Pd/brown, C/gray, Mo/cyan).



**Figure S6.** Most stable adsorption configurations and energies of 3D (side views in square) mode for  $Pt_n$  ( $n = 4, 5$ ) on  $Mo_2C(001)$  (Pt/blue, C/gray, Mo/cyan).



**Figure S7.** Structures and adsorption energies of aggregation mode for  $Pt_n$  ( $n = 1-16$ ) on  $Mo_2C(001)$  (Pt/blue, C/gray, Mo/cyan).



**Figure S8.** Most stable adsorption configurations and energies for single Co, Ni, Cu, Pd, Pt atoms on Mo<sub>2</sub>C(101) (Co/purple, Ni/gray blue, Cu/orange, Pd/brown, Pt/blue, C/gray, Mo/cyan).



**Figure S9.** Structures of dispersion mode for Ni<sub>n</sub> and Cu<sub>n</sub> ( $n = 1-8$ ) on Mo<sub>2</sub>C(101) (Ni/gray blue, Cu/orange, C/gray, Mo/cyan).



**Figure S10.** Structures and adsorption energies of dispersion and aggregation mode for  $\text{Co}_n$ ,  $\text{Ni}_n$ , and  $\text{Cu}_n$  ( $n = 2-4$ ) on  $\text{Mo}_2\text{C}(101)$  (Co/purple, Ni/gray blue, Cu/orange, C/gray, Mo/cyan).



**Figure S11.** Structures (side views in square) and adsorption energies of aggregation mode for  $\text{Co}_n$  ( $n = 9-18, 28$ ) on  $\text{Mo}_2\text{C}(101)$  (Co/purple, C/gray, Mo/cyan).



**Figure S12.** Structures (side views in square) and adsorption energies of aggregation mode for  $Ni_n$  ( $n = 9-18, 28$ ) on  $Mo_2C(101)$  (Ni/gray blue, C/gray, Mo/cyan).



**Figure S13.** Structures (side views in square) and adsorption energies of aggregation mode for  $\text{Cu}_n$  ( $n = 9-18, 28$ ) on  $\text{Mo}_2\text{C}(101)$  (Cu/orange, C/gray, Mo/cyan).



**Figure S14.** Structures of dispersion mode for  $\text{Pt}_n$  ( $n = 1-8$ ) on  $\text{Mo}_2\text{C}(101)$  (Pt/blue, C/gray, Mo/cyan).



**Figure S15.** Structures and adsorption energies of dispersion and aggregation mode for Pd<sub>n</sub> and Pt<sub>n</sub>, (n = 2-4) on Mo<sub>2</sub>C(101) (Pd/brown, Pt/blue, C/gray, Mo/cyan).



**Figure S16.** Structures (side views in square) and adsorption energies of aggregation mode for Pd<sub>n</sub> (n = 9-16, 24) on Mo<sub>2</sub>C(101) (Pd/brown, C/gray, Mo/cyan).



**Figure S17.** Structures (side views in square) and adsorption energies of aggregation mode for  $Pt_n$  ( $n = 9-16, 25$ ) on  $Mo_2C(101)$  (Pt/blue, C/gray, Mo/cyan).



**Figure S18.** Top and side (in square) views of the structures and adsorption energies of aggregation mode for  $\text{Co}_n$  ( $n = 1-16$ ) on MoC(001) (Co/purple, C/gray, Mo/cyan).



**Figure S19.** Top and side (in square) views of the structures and adsorption energies of aggregation mode for  $Ni_n$  ( $n = 1-16$ ) on MoC(001) (Ni/gray blue, C/gray, Mo/cyan).



**Figure S20.** Top and side (in square) views of the structures and adsorption energies of aggregation mode for  $\text{Cu}_n$  ( $n = 1-15$ ) on  $\text{MoC}(001)$  (Cu/orange, C/gray, Mo/cyan).



**Figure S21.** Top and side (in square) views of structures and adsorption energies of aggregation mode for Pd<sub>n</sub> ( $n = 1-13$ ) on MoC(001) (Pd/brown, C/gray, Mo/cyan).



**Figure S22.** Top and side (in square) views of structures and adsorption energies of aggregation mode for  $Pt_n$  ( $n = 1-14$ ) on MoC(001) (Pt/blue, C/gray, Mo/cyan).

**Table S1.** Average aggregation energy [ $E_{agg}(M_{gas})$ , eV], stepwise growth energy [ $E_{growth}(M_{gas})$ , eV], average M-M distance ( $R$ , Å) and average magnetic moment ( $M$ ,  $\mu_B$ ) of  $M_n$  clusters in gas phase ( $M = Co, Ni, Cu, Pd, Pt$ ).

| $M_n$           | $-E_{agg}(M_{gas})$                                                                                                                                                           | $E_{growth}(M_{gas})$        | $R$                                                                                                                                               | $M$                                                             |
|-----------------|-------------------------------------------------------------------------------------------------------------------------------------------------------------------------------|------------------------------|---------------------------------------------------------------------------------------------------------------------------------------------------|-----------------------------------------------------------------|
| Co <sub>2</sub> | 1.54 (2.51, <sup>1</sup> 1.45 <sup>2</sup> )                                                                                                                                  | -3.07                        | 1.992 (1.95, <sup>1</sup> 1.95, <sup>3</sup> 1.96 <sup>2</sup> )                                                                                  | 2.05 (2.00, <sup>1</sup> 2.08, <sup>4</sup> 2.00 <sup>2</sup> ) |
| Co <sub>3</sub> | 1.91 (2.92, <sup>1</sup> 1.78 <sup>2</sup> )                                                                                                                                  | -2.65                        | 2.201 (2.16, <sup>1</sup> 2.19 <sup>2</sup> )                                                                                                     | 2.07 (1.63, <sup>1</sup> 2.33 <sup>2</sup> )                    |
| Co <sub>4</sub> | 2.39 (3.24 <sup>a</sup> , 2.44 <sup>b</sup> , 3.36, <sup>1</sup> 2.27 <sup>2</sup> )                                                                                          | -3.84                        | 2.338 (2.34, <sup>1</sup> 2.34 <sup>2</sup> )                                                                                                     | 2.20 (2.50, <sup>1</sup> 2.50 <sup>2</sup> )                    |
| Co <sub>5</sub> | 2.68 (3.52, <sup>1</sup> 2.55 <sup>2</sup> )                                                                                                                                  | -3.84                        | 2.346 (2.40, <sup>1</sup> 2.34 <sup>2</sup> )                                                                                                     | 2.25 (2.00, <sup>1</sup> 2.60 <sup>2</sup> )                    |
| Co <sub>6</sub> | 3.05(4.06 <sup>a</sup> , 3.13 <sup>b</sup> , 2.93 <sup>2</sup> )                                                                                                              | -4.92                        | 2.279(2.27 <sup>2</sup> )                                                                                                                         | 2.10 (2.33 <sup>2</sup> )                                       |
| Ni <sub>2</sub> | 1.45 (1.74, <sup>11</sup> 1.67 <sup>5</sup> )                                                                                                                                 | -2.90                        | 2.090 (2.10, <sup>1</sup> 2.07, <sup>5</sup> 2.20, <sup>6</sup> 2.155±0.01 <sup>7</sup> )                                                         | 1.00 (1.00, <sup>1</sup> 1.00 <sup>5</sup> )                    |
| Ni <sub>3</sub> | 1.87 (2.00, <sup>1</sup> 2.20 <sup>5</sup> )                                                                                                                                  | -2.72                        | 2.207 (2.23, <sup>1</sup> 2.18 <sup>5</sup> )                                                                                                     | 0.76 (0.70, <sup>1</sup> 0.67 <sup>5</sup> )                    |
| Ni <sub>4</sub> | 2.18 (2.91 <sup>a</sup> , 2.32 <sup>b</sup> , 2.33, <sup>1</sup> 2.51 <sup>5</sup> )                                                                                          | -3.10                        | 2.262 (2.31, <sup>1</sup> 2.25 <sup>5</sup> )                                                                                                     | 0.85 (1.00, <sup>1</sup> 1.00 <sup>5</sup> )                    |
| Ni <sub>5</sub> | 2.44 (2.50, <sup>1</sup> 2.85 <sup>8</sup> )                                                                                                                                  | -3.48                        | 2.309 (2.34, <sup>1</sup> 2.36 <sup>8</sup> )                                                                                                     | 0.78 (0.78, <sup>1</sup> 0.80 <sup>8</sup> )                    |
| Ni <sub>6</sub> | 2.67 (3.61 <sup>a</sup> , 2.83 <sup>b</sup> , 3.06 <sup>8</sup> )                                                                                                             | -3.79                        | 2.320 (2.33 <sup>8</sup> )                                                                                                                        | 1.07 (1.33 <sup>8</sup> )                                       |
| Cu <sub>2</sub> | 1.13 (1.02±0.09, <sup>9</sup> 0.96, <sup>10</sup><br>1.04, <sup>11</sup> 1.16, <sup>12</sup> 1.06, <sup>13</sup> 1.13 <sup>14</sup> )                                         | -2.26 (-2.26 <sup>14</sup> ) | 2.216 (2.25, <sup>10</sup> 2.21, <sup>11</sup> 2.25, <sup>12</sup><br>2.52, <sup>13</sup> 2.22 <sup>14</sup> )                                    | -                                                               |
| Cu <sub>3</sub> | 1.22 (1.07±0.12, <sup>9</sup> 1.00, <sup>10</sup> 0.98, <sup>11</sup><br>1.20, <sup>12</sup> 1.19, <sup>13</sup> 1.23, <sup>14</sup> 1.43 <sup>15</sup> )                     | -1.39 (-1.43 <sup>14</sup> ) | 2.335 (2.45, <sup>10</sup> 2.34, <sup>11</sup> 2.40, <sup>12</sup><br>2.54, <sup>13</sup> 2.35, <sup>14</sup> 2.25 <sup>15</sup> )                | 0.07                                                            |
| Cu <sub>4</sub> | 1.59 (1.88 <sup>a</sup> , 1.63 <sup>b</sup> , 1.48±0.14, <sup>9</sup> 1.31, <sup>10</sup><br>1.40, <sup>11</sup> 1.58, <sup>13</sup> 1.59, <sup>14</sup> 2.00 <sup>15</sup> ) | -2.72 (-2.67 <sup>14</sup> ) | 2.351 (2.42, <sup>10</sup> 2.34, <sup>11</sup> 2.52, <sup>13</sup><br>2.36, <sup>14</sup> 2.23 <sup>15</sup> )                                    | -                                                               |
| Cu <sub>5</sub> | 1.73 (1.56±0.15, <sup>9</sup> 1.43, <sup>10</sup> 1.49, <sup>11</sup><br>1.72, <sup>13</sup> 1.72, <sup>14</sup> 2.24 <sup>15</sup> )                                         | -2.26 (-2.26 <sup>14</sup> ) | 2.360 (2.43, <sup>10</sup> 2.34, <sup>11</sup> 2.50, <sup>13</sup><br>2.36, <sup>14</sup> 2.23 <sup>15</sup> )                                    | 0.06                                                            |
| Cu <sub>6</sub> | 1.92 (1.73±0.18, <sup>9</sup> 1.61, <sup>10</sup><br>1.67, <sup>11</sup> 1.92, <sup>12</sup> 1.91, <sup>13</sup> 1.92 <sup>14</sup> )                                         | -2.88 (-2.88 <sup>14</sup> ) | 2.361 (2.43, <sup>10</sup> 2.35, <sup>11</sup> 2.39, <sup>12</sup><br>2.47, <sup>13</sup> 2.36 <sup>14</sup> )                                    | -                                                               |
| Cu <sub>7</sub> | 2.04 (1.86±0.22, <sup>9</sup> 1.69, <sup>10</sup> 1.72, <sup>11</sup><br>2.03, <sup>13</sup> 2.63 <sup>14</sup> )                                                             | -2.79 (-2.80 <sup>14</sup> ) | 2.422 (2.50, <sup>10</sup> 2.39, <sup>11</sup><br>2.48, <sup>13</sup> 2.41 <sup>14</sup> )                                                        | 0.04                                                            |
| Pd <sub>2</sub> | 0.67 (0.95 <sup>a</sup> , 0.67 <sup>b</sup> )                                                                                                                                 | -1.34                        | 2.472 (2.627-2.668, <sup>16</sup> 2.548-2.612 <sup>16</sup> )                                                                                     | 0.60                                                            |
| Pd <sub>3</sub> | 1.28                                                                                                                                                                          | -2.50                        | 2.482                                                                                                                                             | 0.63                                                            |
| Pd <sub>4</sub> | 1.69 (2.22 <sup>a</sup> , 1.72 <sup>b</sup> , 1.45 <sup>17</sup> )                                                                                                            | -2.92                        | 2.595 (2.591, <sup>18</sup> 2.661 <sup>18</sup> )                                                                                                 | 0.48                                                            |
| Pd <sub>5</sub> | 1.82                                                                                                                                                                          | -2.32                        | 2.632                                                                                                                                             | 0.39                                                            |
| Pd <sub>6</sub> | 1.96                                                                                                                                                                          | -2.67                        | 2.651                                                                                                                                             | 0.33                                                            |
| Pd <sub>7</sub> | 1.99                                                                                                                                                                          | -2.18                        | 2.689                                                                                                                                             | 0.27                                                            |
| Pt <sub>2</sub> | 1.98<br>(1.95, <sup>19</sup> 1.86, <sup>20</sup> 1.63, <sup>21</sup> 1.76 <sup>22</sup> )                                                                                     | -3.96                        | 2.322 (2.32, <sup>19</sup> 2.33, <sup>20</sup> 2.45, <sup>21</sup> 2.34, <sup>22</sup> 2.462-<br>2.605, <sup>16</sup> 2.427-2.574 <sup>16</sup> ) | 0.89                                                            |
| Pt <sub>3</sub> | 2.53 (2.50, <sup>19</sup> 2.41, <sup>20</sup> 2.22, <sup>21</sup> 2.33 <sup>22</sup> )                                                                                        | -3.64                        | 2.467 (2.48, <sup>19</sup> 2.49, <sup>20</sup> 2.57, <sup>21</sup> 2.47 <sup>22</sup> )                                                           | 0.59                                                            |
| Pt <sub>4</sub> | 2.77 (3.43 <sup>a</sup> , 2.88 <sup>b</sup> , 2.06, <sup>19</sup> 2.70, <sup>20</sup><br>2.62 <sup>22</sup> )                                                                 | -3.49                        | 2.489 (2.51, <sup>19</sup> 2.51, <sup>20</sup> 2.51-2.58 <sup>22</sup> )                                                                          | -0.82                                                           |
| Pt <sub>5</sub> | 3.08 (3.80, <sup>19</sup> 2.96, <sup>20</sup> 2.89 <sup>22</sup> )                                                                                                            | -4.33                        | 2.463 (2.46, <sup>19</sup> 2.43-2.51 <sup>22</sup> )                                                                                              | 0.37                                                            |
| Pt <sub>6</sub> | 3.33 (4.04 <sup>a</sup> , 3.41 <sup>b</sup> , 3.31, <sup>19</sup> 3.21, <sup>20</sup><br>2.94, <sup>21</sup> 3.08 <sup>22</sup> )                                             | -4.54                        | 2.511 (2.54, <sup>19</sup> 2.49-2.61 <sup>22</sup> )                                                                                              | -0.12                                                           |
| Pt <sub>7</sub> | 3.40 (3.37 <sup>19</sup> , 3.26 <sup>20</sup> )                                                                                                                               | -3.87                        | 2.523 (2.53 <sup>19</sup> )                                                                                                                       | 0.38                                                            |

<sup>a</sup>Calculated results from RPBE functional. <sup>b</sup>Calculated results under van der Waals dispersion correction (D3 method).

**Table S2.** Possible adsorption site, optimized adsorption site and adsorption energy (eV) for single Co, Ni, Cu, Pd, Pt atoms on Mo<sub>2</sub>C(001), Mo<sub>2</sub>C(101) and MoC(001).

| Site                           | Optimized adsorption site |     |           |           |           | Adsorption energy (eV) |       |       |        |        |
|--------------------------------|---------------------------|-----|-----------|-----------|-----------|------------------------|-------|-------|--------|--------|
|                                | Co                        | Ni  | Cu        | Pd        | Pt        | Co                     | Ni    | Cu    | Pd     | Pt     |
| Mo <sub>2</sub> C(001) surface |                           |     |           |           |           |                        |       |       |        |        |
| t1                             | 3h1                       | 3h1 | 3h1       | 3h1       | 3h1       | -4.78                  | -4.78 | -3.46 | -9.49  | -11.70 |
| t2                             | 3h1                       | 3h1 | 3h1       | 3h1       | 3h1       | -4.78                  | -4.78 | -3.46 | -9.49  | -11.70 |
| b1                             | 3h2                       | 3h2 | 3h2       | 3h2       | 3h2       | -4.53                  | -4.59 | -3.41 | -9.39  | -11.52 |
| b2                             | 3h1                       | 3h4 | 3h1       | 3h1       | 3h1       | -4.78                  | -4.64 | -3.46 | -9.49  | -11.70 |
| b3                             | 3h1                       | 3h1 | 3h1       | 3h1       | 3h1       | -4.78                  | -4.78 | -3.46 | -9.49  | -11.70 |
| b4                             | 3h1                       | 3h1 | 3h2       | 3h1       | 3h2       | -4.78                  | -4.78 | -3.41 | -9.49  | -11.52 |
| 3h1                            | 3h1                       | 3h1 | 3h1       | 3h1       | 3h1       | -4.78                  | -4.78 | -3.46 | -9.49  | -11.70 |
| 3h2                            | 3h2                       | 3h2 | 3h2       | 3h2       | 3h2       | -4.53                  | -4.59 | -3.41 | -9.39  | -11.52 |
| 3h3                            | 3h3                       | 3h3 | 3h3       | 3h3       | 3h3       | -4.19                  | -4.30 | -3.27 | -9.03  | -11.06 |
| 3h4                            | 3h1                       | 3h4 | 3h1       | 3h1       | 3h1       | -4.78                  | -4.64 | -3.46 | -9.49  | -11.70 |
| Mo <sub>2</sub> C(101) surface |                           |     |           |           |           |                        |       |       |        |        |
| t1                             | b2                        | b2  | b2        | t1        | t1        | -5.70                  | -5.48 | -3.72 | -9.81  | -11.50 |
| t2                             | b2                        | b2  | b2        | b2        | b2        | -5.70                  | -5.48 | -3.72 | -10.78 | -12.48 |
| t3                             | 3h1                       | 3h1 | 3h1       | 3h1       | 3h1       | -3.44                  | -3.55 | -2.30 | -9.77  | -11.42 |
| t4                             | b8                        | b8  | b2        | 3h3       | 3h1       | -3.31                  | -3.30 | -3.72 | -9.78  | -11.42 |
| b1                             | 3h1                       | 3h1 | b2        | 3h1       | 3h1       | -3.41                  | -3.55 | -3.72 | -9.78  | -11.42 |
| b2                             | b2                        | b2  | b2        | b2        | b2        | -5.70                  | -5.47 | -3.71 | -10.78 | -12.48 |
| b3                             | b3                        | b3  | b2        | 3h3       | 3h3       | -3.29                  | -3.53 | -3.72 | -9.78  | -11.16 |
| b4                             | b2                        | b2  | b2        | b2        | t1        | -5.70                  | -5.48 | -3.72 | -10.78 | -11.50 |
| b5                             | b2                        | b2  | tilted b4 | tilted t1 | tilted t1 | -5.70                  | -5.48 | -2.58 | -9.81  | -11.50 |
| b6                             | 3h1                       | 3h1 | 3h1       | 3h1       | 3h1       | -3.41                  | -3.55 | -2.30 | -9.77  | -11.42 |
| b7                             | b2                        | b3  | b7        | 3h3       | 3h3       | -5.70                  | -3.49 | -2.10 | -9.78  | -11.17 |
| b8                             | b8                        | b8  | b8        | b8        | 3h1       | -3.28                  | -3.26 | -1.94 | -9.41  | -11.42 |
| 3h1                            | 3h1                       | 3h1 | 3h1       | 3h1       | 3h1       | -3.41                  | -3.51 | -2.26 | -9.75  | -11.42 |
| 3h2                            | b8                        | 3h2 | 3h1       | 3h3       | 3h1       | -3.31                  | -3.35 | -2.30 | -9.78  | -11.42 |
| 3h3                            | b2                        | b3  | b2        | 3h3       | 3h3       | -5.70                  | -3.49 | -3.72 | -9.75  | -11.17 |
| 4h1                            | b2                        | b2  | b2        | b2        | b2        | -5.70                  | -5.48 | -3.72 | -10.78 | -12.48 |
| 4h2                            | b2                        | b2  | b2        | b2        | b2        | -5.70                  | -5.48 | -3.72 | -10.78 | -12.48 |
| MoC(001) surface               |                           |     |           |           |           |                        |       |       |        |        |
| t1                             | 4h                        | 4h  | t1        | t1        | t1        | -4.71                  | -4.52 | -2.67 | -8.95  | -10.50 |
| t2                             | 4h                        | 4h  | t2        | 4h        | 4h        | -4.71                  | -4.52 | -1.82 | -8.76  | -10.31 |
| b                              | 4h                        | 4h  | tilted t1 | t1        | t1        | -4.71                  | -4.52 | -2.68 | -8.95  | -10.50 |
| 4h                             | 4h                        | 4h  | 4h        | t1        | 4h        | -4.71                  | -4.52 | -2.76 | -8.95  | -10.24 |

**Table S3.** Adsorption energy [ $E(\text{Co}_n/\text{ads})$ ; eV], average adsorption energy [ $E(\text{Co}_{\text{ads}/\text{av}})$ ; eV], stepwise adsorption energy [ $\Delta E(\text{Co}_{\text{ads}})$ ; eV], average aggregation energy [ $E_{\text{agg}}(\text{Co}_{\text{ads}})$ ; eV], stepwise growth energy [ $E_{\text{growth}}(\text{Co}_{\text{ads}})$ ; eV], coordination number (CN) with surface Mo atoms, number of Co-Co bond (NB-Co), average Co-Co distance ( $d$ , Å), and average Bader charge ( $q$ , e) for  $\text{Co}_n$  on  $\text{Mo}_2\text{C}(001)$ .

| Species                  | $E(\text{Co}_n/\text{ads})$ | $E(\text{Co}_{\text{ads}/\text{av}})$ | $\Delta E(\text{Co}_{\text{ads}})$ | $E_{\text{agg}}(\text{Co}_{\text{ads}})$ | $E_{\text{growth}}(\text{Co}_{\text{ads}})$ | CN | NB-Co | $d$   | $q$   |
|--------------------------|-----------------------------|---------------------------------------|------------------------------------|------------------------------------------|---------------------------------------------|----|-------|-------|-------|
| 1×Co                     | -4.78                       | -4.78                                 | -4.78                              | -                                        | -                                           | 3  | 0     | -     | -0.44 |
| Aggregation mode         |                             |                                       |                                    |                                          |                                             |    |       |       |       |
| 2×Co                     | -9.53                       | -4.77                                 | -4.75                              | 0.02                                     | 0.03                                        | 6  | 1     | 2.336 | -0.37 |
| 3×Co                     | -14.47                      | -4.82                                 | -4.94                              | -0.04                                    | -0.16                                       | 9  | 3     | 2.483 | -0.32 |
| 4×Co                     | -19.62                      | -4.91                                 | -5.15                              | -0.13                                    | -0.37                                       | 12 | 4     | 2.459 | -0.32 |
| 5×Co                     | -24.33                      | -4.87                                 | -4.71                              | -0.09                                    | 0.07                                        | 15 | 7     | 2.515 | -0.29 |
| Mode a                   |                             |                                       |                                    |                                          |                                             |    |       |       |       |
| 6×Co-a                   | -29.42                      | -4.90                                 | -5.09                              | -0.12                                    | -0.31                                       | 18 | 9     | 2.483 | -0.27 |
| 7×Co-a                   | -34.79                      | -4.97                                 | -5.37                              | -0.19                                    | -0.59                                       | 21 | 10    | 2.486 | -0.28 |
| 8×Co-a                   | -39.94                      | -4.99                                 | -5.15                              | -0.21                                    | -0.37                                       | 24 | 11    | 2.460 | -0.29 |
| 9×Co-a                   | -45.02                      | -5.00                                 | -5.08                              | -0.22                                    | -0.30                                       | 26 | 13    | 2.456 | -0.29 |
| 10×Co-a                  | -50.15                      | -5.02                                 | -5.13                              | -0.23                                    | -0.35                                       | 28 | 16    | 2.478 | -0.27 |
| 11×Co-a                  | -55.69                      | -5.06                                 | -5.54                              | -0.28                                    | -0.76                                       | 29 | 20    | 2.486 | -0.26 |
| 12×Co-a                  | -60.67                      | -5.06                                 | -4.98                              | -0.28                                    | -0.20                                       | 32 | 23    | 2.491 | -0.25 |
| Mode b                   |                             |                                       |                                    |                                          |                                             |    |       |       |       |
| 6×Co-b                   | -29.41                      | -4.90                                 | -5.08                              | -0.12                                    | -0.30                                       | 18 | 8     | 2.481 | -0.29 |
| 7×Co-b                   | -34.54                      | -4.93                                 | -5.13                              | -0.15                                    | -0.35                                       | 21 | 10    | 2.451 | -0.29 |
| 8×Co-b                   | -39.77                      | -4.97                                 | -5.23                              | -0.19                                    | -0.45                                       | 22 | 13    | 2.481 | -0.27 |
| 9×Co-b                   | -44.84                      | -4.98                                 | -5.07                              | -0.20                                    | -0.29                                       | 25 | 16    | 2.486 | -0.26 |
| 10×Co-b                  | -50.33                      | -5.03                                 | -5.49                              | -0.25                                    | -0.71                                       | 28 | 20    | 2.485 | -0.24 |
| 11×Co-b                  | -55.43                      | -5.04                                 | -5.10                              | -0.26                                    | -0.32                                       | 31 | 22    | 2.492 | -0.24 |
| 12×Co-b                  | -60.67                      | -5.06                                 | -5.24                              | -0.28                                    | -0.46                                       | 34 | 24    | 2.485 | -0.23 |
| Aggregation mode         |                             |                                       |                                    |                                          |                                             |    |       |       |       |
| 13×Co                    | -66.07                      | -5.08                                 | -5.40                              | -0.30                                    | -0.62                                       | 35 | 27    | 2.491 | -0.24 |
| 14×Co                    | -71.22                      | -5.09                                 | -5.15                              | -0.31                                    | -0.37                                       | 40 | 30    | 2.482 | -0.23 |
| 15×Co                    | -76.55                      | -5.10                                 | -5.33                              | -0.32                                    | -0.55                                       | 43 | 34    | 2.470 | -0.22 |
| 25×Co                    | -131.64                     | -5.27                                 |                                    | -0.49                                    |                                             | 55 | 75    | 2.468 | -0.17 |
| Dispersion mode c        |                             |                                       |                                    |                                          |                                             |    |       |       |       |
| 2×Co-c                   | -9.70                       | -4.85                                 | -4.92                              | -0.07                                    | -0.14                                       | 6  | 0     | -     | -0.42 |
| 3×Co-c                   | -14.47                      | -4.82                                 | -4.77                              | -0.04                                    | 0.01                                        | 9  | 0     | -     | -0.42 |
| 4×Co-c                   | -19.31                      | -4.83                                 | -4.84                              | -0.05                                    | -0.06                                       | 12 | 0     | -     | -0.43 |
| 5×Co-c                   | -24.01                      | -4.80                                 | -4.70                              | -0.02                                    | 0.08                                        | 15 | 0     | -     | -0.39 |
| Three-dimensional mode d |                             |                                       |                                    |                                          |                                             |    |       |       |       |
| 4×Co-d                   | -17.72                      | -4.43                                 | -3.25                              | 0.35                                     | 1.53                                        | 9  | 6     | 2.357 | -0.24 |
| 5×Co-d                   | -23.06                      | -4.61                                 | -5.34                              | 0.17                                     | -0.56                                       | 12 | 8     | 2.382 | -0.24 |
| 6×Co-d                   | -28.20                      | -4.70                                 | -5.14                              | 0.08                                     | -0.36                                       | 15 | 10    | 2.395 | -0.24 |
| 7×Co-d                   | -32.97                      | -4.71                                 | -4.77                              | 0.07                                     | 0.01                                        | 18 | 11    | 2.416 | -0.25 |

**Table S4.** Adsorption energy [ $E(\text{Ni}_{n/\text{ads}})$ ; eV], average adsorption energy [ $E(\text{Ni}_{\text{ads}/\text{av}})$ ; eV], stepwise adsorption energy [ $\Delta E(\text{Ni}_{\text{ads}})$ ; eV], average aggregation energy [ $E_{\text{agg}}(\text{Ni}_{\text{ads}})$ ; eV], stepwise growth energy [ $E_{\text{growth}}(\text{Ni}_{\text{ads}})$ ; eV], coordination number (CN) with surface Mo atoms, number of Ni-Ni bond (NB-Ni), average Ni-Ni distance ( $d$ , Å), and average Bader charge ( $q$ , e) for  $\text{Ni}_n$  on  $\text{Mo}_2\text{C}(001)$ .

| Species                  | $E(\text{Ni}_{n/\text{ads}})$ | $E(\text{Ni}_{\text{ads}/\text{av}})$ | $\Delta E(\text{Ni}_{\text{ads}})$ | $E_{\text{agg}}(\text{Ni}_{\text{ads}})$ | $E_{\text{growth}}(\text{Ni}_{\text{ads}})$ | CN | NB-Ni | $d$   | $q$   |
|--------------------------|-------------------------------|---------------------------------------|------------------------------------|------------------------------------------|---------------------------------------------|----|-------|-------|-------|
| 1×Ni                     | -4.78                         | -4.78                                 | -4.78                              | -                                        | -                                           | 3  | 0     | -     | -0.44 |
| Aggregation mode         |                               |                                       |                                    |                                          |                                             |    |       |       |       |
| 2×Ni                     | -9.48                         | -4.74                                 | -4.70                              | 0.04                                     | 0.08                                        | 6  | 1     | 2.396 | -0.36 |
| 3×Ni                     | -14.58                        | -4.86                                 | -5.10                              | -0.08                                    | -0.32                                       | 9  | 3     | 2.550 | -0.33 |
| Mode a                   |                               |                                       |                                    |                                          |                                             |    |       |       |       |
| 4×Ni-a                   | -19.33                        | -4.83                                 | -4.75                              | -0.05                                    | 0.03                                        | 12 | 4     | 2.488 | -0.31 |
| 5×Ni-a                   | -24.41                        | -4.88                                 | -5.08                              | -0.10                                    | -0.30                                       | 14 | 5     | 2.501 | -0.32 |
| 6×Ni-a                   | -29.49                        | -4.92                                 | -5.08                              | -0.14                                    | -0.30                                       | 17 | 7     | 2.486 | -0.31 |
| 7×Ni-a                   | -34.43                        | -4.92                                 | -4.94                              | -0.14                                    | -0.16                                       | 21 | 10    | 2.498 | -0.29 |
| 8×Ni-a                   | -39.45                        | -4.93                                 | -5.02                              | -0.15                                    | -0.24                                       | 23 | 13    | 2.499 | -0.27 |
| 9×Ni-a                   | -44.60                        | -4.96                                 | -5.15                              | -0.18                                    | -0.37                                       | 26 | 16    | 2.518 | -0.26 |
| 10×Ni-a                  | -49.89                        | -4.99                                 | -5.29                              | -0.21                                    | -0.51                                       | 30 | 20    | 2.522 | -0.25 |
| 11×Ni-a                  | -54.84                        | -4.99                                 | -4.95                              | -0.21                                    | -0.17                                       | 32 | 22    | 2.520 | -0.24 |
| 12×Ni-a                  | -59.99                        | -5.00                                 | -5.15                              | -0.22                                    | -0.37                                       | 34 | 25    | 2.526 | -0.23 |
| 13×Ni-a                  | -65.24                        | -5.02                                 | -5.25                              | -0.24                                    | -0.47                                       | 37 | 27    | 2.526 | -0.24 |
| 14×Ni-a                  | -70.46                        | -5.03                                 | -5.22                              | -0.25                                    | -0.44                                       | 39 | 30    | 2.519 | -0.23 |
| Mode b                   |                               |                                       |                                    |                                          |                                             |    |       |       |       |
| 4×Ni-b                   | -19.32                        | -4.83                                 | -4.74                              | -0.05                                    | 0.04                                        | 12 | 5     | 2.640 | -0.30 |
| 5×Ni-b                   | -24.32                        | -4.86                                 | -5.00                              | -0.08                                    | -0.22                                       | 15 | 7     | 2.613 | -0.29 |
| 6×Ni-b                   | -29.26                        | -4.88                                 | -4.94                              | -0.10                                    | -0.16                                       | 18 | 9     | 2.562 | -0.27 |
| 7×Ni-b                   | -34.43                        | -4.92                                 | -5.17                              | -0.14                                    | -0.39                                       | 20 | 10    | 2.545 | -0.28 |
| 8×Ni-b                   | -39.58                        | -4.95                                 | -5.15                              | -0.17                                    | -0.37                                       | 22 | 11    | 2.503 | -0.29 |
| 9×Ni-b                   | -44.64                        | -4.96                                 | -5.06                              | -0.18                                    | -0.28                                       | 25 | 13    | 2.485 | -0.28 |
| 10×Ni-b                  | -49.68                        | -4.97                                 | -5.04                              | -0.19                                    | -0.26                                       | 28 | 15    | 2.481 | -0.27 |
| 11×Ni-b                  | -54.84                        | -4.99                                 | -5.16                              | -0.21                                    | -0.38                                       | 31 | 20    | 2.518 | -0.25 |
| 12×Ni-b                  | -59.99                        | -5.00                                 | -5.15                              | -0.22                                    | -0.37                                       | 34 | 23    | 2.516 | -0.24 |
| 13×Ni-b                  | -65.06                        | -5.00                                 | -5.07                              | -0.22                                    | -0.29                                       | 36 | 25    | 2.514 | -0.23 |
| 14×Ni-b                  | -70.46                        | -5.03                                 | -5.40                              | -0.25                                    | -0.62                                       | 38 | 30    | 2.520 | -0.22 |
| Aggregation mode         |                               |                                       |                                    |                                          |                                             |    |       |       |       |
| 15×Ni                    | -75.87                        | -5.06                                 | -5.41                              | -0.28                                    | -0.63                                       | 42 | 34    | 2.515 | -0.22 |
| 25×Ni                    | -127.64                       | -5.11                                 |                                    | -0.33                                    |                                             | 54 | 75    | 2.438 | -0.17 |
| Dispersion mode c        |                               |                                       |                                    |                                          |                                             |    |       |       |       |
| 2×Ni-c                   | -9.64                         | -4.82                                 | -4.86                              | -0.04                                    | -0.08                                       | 6  | 0     | -     | -0.44 |
| 3×Ni-c                   | -14.50                        | -4.83                                 | -4.86                              | -0.05                                    | -0.08                                       | 9  | 0     | -     | -0.43 |
| 4×Ni-c                   | -19.34                        | -4.84                                 | -4.84                              | -0.05                                    | -0.06                                       | 12 | 0     | -     | -0.43 |
| 5×Ni-c                   | -24.14                        | -4.83                                 | -4.80                              | -0.05                                    | -0.02                                       | 15 | 1     | 2.893 | -0.38 |
| Three-dimensional mode d |                               |                                       |                                    |                                          |                                             |    |       |       |       |
| 4×Ni-d                   | -17.76                        | -4.44                                 | -3.26                              | 0.34                                     | 1.52                                        | 9  | 6     | 2.437 | -0.25 |
| 5×Ni-d                   | -22.80                        | -4.56                                 | -5.04                              | 0.22                                     | -0.26                                       | 12 | 8     | 2.512 | -0.25 |
| 6×Ni-d                   | -27.84                        | -4.64                                 | -5.04                              | 0.14                                     | -0.26                                       | 15 | 10    | 2.457 | -0.24 |
| 7×Ni-d                   | -32.89                        | -4.70                                 | -5.05                              | 0.08                                     | -0.27                                       | 18 | 12    | 2.454 | -0.23 |

**Table S5.** Adsorption energy [ $E(\text{Cu}_n/\text{ads})$ ; eV] (values in parentheses corrected by D3 method), average adsorption energy [ $E(\text{Cu}_{\text{ads}/\text{av}})$ ; eV], stepwise adsorption energy [ $\Delta E(\text{Cu}_{\text{ads}})$ ; eV], average aggregation energy [ $E_{\text{agg}}(\text{Cu}_{\text{ads}})$ ; eV], stepwise growth energy [ $E_{\text{growth}}(\text{Cu}_{\text{ads}})$ ; eV], coordination number (CN) with surface Mo atoms, number of Cu-Cu bond (NB-Cu), average Cu-Cu distance ( $d$ , Å), and average Bader charge ( $q$ , e) for  $\text{Cu}_n$  on  $\text{Mo}_2\text{C}(001)$ .

| Species                  | $E(\text{Cu}_n/\text{ads})$ | $E(\text{Cu}_{\text{ads}/\text{av}})$ | $\Delta E(\text{Cu}_{\text{ads}})$ | $E_{\text{agg}}(\text{Cu}_{\text{ads}})$ | $E_{\text{growth}}(\text{Cu}_{\text{ads}})$ | CN | NB-Cu | $d$   | $q$   |
|--------------------------|-----------------------------|---------------------------------------|------------------------------------|------------------------------------------|---------------------------------------------|----|-------|-------|-------|
| 1×Cu                     | -3.46                       | -3.46                                 | -3.46                              | -                                        | -                                           | 3  | 0     | -     | -0.32 |
| Aggregation mode         |                             |                                       |                                    |                                          |                                             |    |       |       |       |
| 2×Cu                     | -7.07                       | -3.54                                 | -3.61                              | -0.08                                    | -0.15                                       | 6  | 1     | 2.551 | -0.26 |
| 3×Cu                     | -10.83                      | -3.61                                 | -3.76                              | -0.15                                    | -0.30                                       | 9  | 3     | 2.569 | -0.21 |
| Mode a                   |                             |                                       |                                    |                                          |                                             |    |       |       |       |
| 4×Cu-a                   | -14.49 (-10.91)             | -3.62                                 | -3.66                              | -0.16                                    | -0.20                                       | 12 | 5     | 2.644 | -0.20 |
| 5×Cu-a                   | -18.29                      | -3.66                                 | -3.8                               | -0.20                                    | -0.34                                       | 15 | 7     | 2.696 | -0.21 |
| 6×Cu-a                   | -22.02 (-19.74)             | -3.67                                 | -3.73                              | -0.21                                    | -0.27                                       | 18 | 9     | 2.705 | -0.20 |
| 7×Cu-a                   | -25.88                      | -3.70                                 | -3.86                              | -0.24                                    | -0.40                                       | 21 | 11    | 2.754 | -0.19 |
| 8×Cu-a                   | -29.80 (-28.25)             | -3.73                                 | -3.92                              | -0.27                                    | -0.46                                       | 24 | 14    | 2.707 | -0.18 |
| Mode b                   |                             |                                       |                                    |                                          |                                             |    |       |       |       |
| 4×Cu-b                   | -14.45                      | -3.61                                 | -3.62                              | -0.15                                    | -0.16                                       | 12 | 5     | 2.679 | -0.20 |
| 5×Cu-b                   | -18.12                      | -3.62                                 | -3.67                              | -0.16                                    | -0.21                                       | 15 | 7     | 2.709 | -0.20 |
| 6×Cu-b                   | -21.94                      | -3.66                                 | -3.82                              | -0.20                                    | -0.36                                       | 18 | 9     | 2.727 | -0.20 |
| 7×Cu-b                   | -25.67                      | -3.67                                 | -3.73                              | -0.21                                    | -0.27                                       | 21 | 11    | 2.733 | -0.20 |
| 8×Cu-b                   | -29.52                      | -3.69                                 | -3.85                              | -0.23                                    | -0.39                                       | 24 | 13    | 2.773 | -0.19 |
| Aggregation mode         |                             |                                       |                                    |                                          |                                             |    |       |       |       |
| 9×Cu                     | -33.44                      | -3.72                                 | -3.64                              | -0.26                                    | -0.18                                       | 27 | 16    | 2.777 | -0.18 |
| 10×Cu                    | -37.19                      | -3.72                                 | -3.75                              | -0.26                                    | -0.29                                       | 30 | 19    | 2.769 | -0.17 |
| 11×Cu                    | -40.96                      | -3.72                                 | -3.77                              | -0.26                                    | -0.31                                       | 33 | 21    | 2.776 | -0.17 |
| 12×Cu                    | -44.67                      | -3.72                                 | -3.71                              | -0.26                                    | -0.25                                       | 36 | 25    | 2.795 | -0.16 |
| 25×Cu                    | -93.07                      | -3.72                                 |                                    | -0.26                                    |                                             | 53 | 76    | 2.446 | -0.12 |
| Dispersion mode c        |                             |                                       |                                    |                                          |                                             |    |       |       |       |
| 2×Cu-c                   | -6.98 (-2.52)               | -3.49                                 | -3.52                              | -0.03                                    | -0.06                                       | 6  | 0     | -     | -0.33 |
| 3×Cu-c                   | -10.67                      | -3.56                                 | -3.69                              | -0.10                                    | -0.23                                       | 9  | 0     | -     | -0.32 |
| 4×Cu-c                   | -13.95 (-10.38)             | -3.49                                 | -3.28                              | -0.03                                    | 0.18                                        | 12 | 0     | -     | -0.30 |
| 5×Cu-c                   | -17.69                      | -3.54                                 | -3.74                              | -0.08                                    | -0.28                                       | 15 | 2     | 2.895 | -0.29 |
| Three-dimensional mode d |                             |                                       |                                    |                                          |                                             |    |       |       |       |
| 4×Cu-d                   | -13.21 (-9.42)              | -3.30                                 | -2.54                              | 0.16                                     | 0.92                                        | 9  | 6     | 2.555 | -0.16 |
| 5×Cu-d                   | -17.05                      | -3.41                                 | -3.84                              | 0.05                                     | -0.38                                       | 12 | 9     | 2.589 | -0.16 |
| 6×Cu-d                   | -20.85 (-18.01)             | -3.48                                 | -3.80                              | -0.02                                    | -0.34                                       | 15 | 10    | 2.569 | -0.16 |
| 7×Cu-d                   | -24.63                      | -3.52                                 | -3.78                              | -0.06                                    | -0.32                                       | 18 | 12    | 2.600 | -0.17 |

**Table S6.** Adsorption energy [ $E(\text{Pd}_{n/\text{ads}})$ ; eV], average adsorption energy [ $E(\text{Pd}_{\text{ads}/\text{av}})$ ; eV], stepwise adsorption energy [ $\Delta E(\text{Pd}_{\text{ads}})$ ; eV], average aggregation energy [ $E_{\text{agg}}(\text{Pd}_{\text{ads}})$ ; eV], stepwise growth energy [ $E_{\text{growth}}(\text{Pd}_{\text{ads}})$ ; eV], coordination number (CN) with surface Mo atoms, number of Pd-Pd bond (NB-Pd), average Pd-Pd distance ( $d$ , Å), and average Bader charge ( $q$ , e) for  $\text{Pd}_n$  on  $\text{Mo}_2\text{C}(001)$ .

| Species                  | $E(\text{Pd}_{n/\text{ads}})$ | $E(\text{Pd}_{\text{ads}/\text{av}})$ | $\Delta E(\text{Pd}_{\text{ads}})$ | $E_{\text{agg}}(\text{Pd}_{\text{ads}})$ | $E_{\text{growth}}(\text{Pd}_{\text{ads}})$ | CN | NB-Pd | $d$   | $q$   |
|--------------------------|-------------------------------|---------------------------------------|------------------------------------|------------------------------------------|---------------------------------------------|----|-------|-------|-------|
| 1×Pd                     | -9.49                         | -9.49                                 | -9.49                              | -                                        | -                                           | 3  | 0     | -     | -0.57 |
| Aggregation mode         |                               |                                       |                                    |                                          |                                             |    |       |       |       |
| 2×Pd                     | -13.73                        | -6.87                                 | -4.24                              | 2.63                                     | 5.25                                        | 6  | 1     | 2.987 | -0.50 |
| 3×Pd                     | -18.35                        | -6.12                                 | -4.62                              | 3.37                                     | 4.87                                        | 9  | 2     | 2.992 | -0.50 |
| 4×Pd                     | -22.76                        | -5.69                                 | -4.41                              | 3.80                                     | 5.08                                        | 12 | 4     | 3.057 | -0.46 |
| 5×Pd                     | -26.94                        | -5.39                                 | -4.18                              | 4.10                                     | 5.31                                        | 15 | 6     | 3.027 | -0.44 |
| Mode a                   |                               |                                       |                                    |                                          |                                             |    |       |       |       |
| 6×Pd-a                   | -31.38                        | -5.23                                 | -4.44                              | 4.26                                     | 5.05                                        | 18 | 9     | 2.998 | -0.42 |
| 7×Pd-a                   | -35.75                        | -5.11                                 | -4.37                              | 4.38                                     | 5.12                                        | 21 | 12    | 2.979 | -0.40 |
| 8×Pd-a                   | -40.37                        | -5.05                                 | -4.62                              | 4.44                                     | 4.87                                        | 24 | 16    | 2.991 | -0.38 |
| 9×Pd-a                   | -44.90                        | -4.99                                 | -4.53                              | 4.50                                     | 4.96                                        | 27 | 18    | 3.004 | -0.39 |
| 10×Pd-a                  | -49.44                        | -4.94                                 | -4.54                              | 4.55                                     | 4.95                                        | 30 | 20    | 3.009 | -0.40 |
| 11×Pd-a                  | -54.11                        | -4.92                                 | -4.67                              | 4.57                                     | 4.82                                        | 33 | 24    | 2.983 | -0.37 |
| 12×Pd-a                  | -58.83                        | -4.90                                 | -4.72                              | 4.59                                     | 4.77                                        | 36 | 28    | 2.975 | -0.36 |
| 13×Pd-a                  | -63.40                        | -4.88                                 | -4.57                              | 4.61                                     | 4.92                                        | 39 | 32    | 3.005 | -0.35 |
| 14×Pd-a                  | -68.10                        | -4.86                                 | -4.70                              | 4.63                                     | 4.79                                        | 42 | 37    | 3.018 | -0.34 |
| 15×Pd-a                  | -72.77                        | -4.85                                 | -4.67                              | 4.64                                     | 4.82                                        | 45 | 42    | 3.032 | -0.33 |
| Mode b                   |                               |                                       |                                    |                                          |                                             |    |       |       |       |
| 6×Pd-b                   | -31.29                        | -5.22                                 | -4.35                              | 4.28                                     | 5.14                                        | 18 | 9     | 2.991 | -0.42 |
| 7×Pd-b                   | -35.83                        | -5.12                                 | -4.54                              | 4.37                                     | 4.95                                        | 21 | 10    | 3.013 | -0.43 |
| 8×Pd-b                   | -40.44                        | -5.06                                 | -4.61                              | 4.44                                     | 4.88                                        | 24 | 11    | 3.023 | -0.43 |
| 9×Pd-b                   | -45.03                        | -5.00                                 | -4.59                              | 4.49                                     | 4.90                                        | 27 | 16    | 2.964 | -0.41 |
| 10×Pd-b                  | -49.57                        | -4.96                                 | -4.54                              | 4.53                                     | 4.95                                        | 30 | 20    | 2.988 | -0.39 |
| 11×Pd-b                  | -54.25                        | -4.93                                 | -4.68                              | 4.56                                     | 4.81                                        | 33 | 25    | 2.958 | -0.37 |
| 12×Pd-b                  | -58.78                        | -4.90                                 | -4.53                              | 4.59                                     | 4.96                                        | 36 | 28    | 3.006 | -0.36 |
| 13×Pd-b                  | -63.49                        | -4.88                                 | -4.71                              | 4.61                                     | 4.78                                        | 39 | 33    | 3.017 | -0.35 |
| 14×Pd-b                  | -68.10                        | -4.86                                 | -4.61                              | 4.63                                     | 4.88                                        | 42 | 37    | 3.018 | -0.34 |
| 15×Pd-b                  | -72.77                        | -4.85                                 | -4.67                              | 4.64                                     | 4.82                                        | 45 | 42    | 3.032 | -0.33 |
| Aggregation mode         |                               |                                       |                                    |                                          |                                             |    |       |       |       |
| 16×Pd                    | -77.61                        | -4.85                                 | -4.84                              | 4.64                                     | 4.65                                        | 48 | 48    | 3.021 | -0.32 |
| Dispersion mode c        |                               |                                       |                                    |                                          |                                             |    |       |       |       |
| 2×Pd-c                   | -13.96                        | -6.98                                 | -4.47                              | 2.51                                     | 5.02                                        | 6  | 0     | -     | -0.56 |
| 3×Pd-c                   | -18.36                        | -6.12                                 | -4.40                              | 3.37                                     | 5.09                                        | 9  | 0     | -     | -0.58 |
| 4×Pd-c                   | -22.86                        | -5.72                                 | -4.50                              | 3.78                                     | 4.99                                        | 12 | 0     | -     | -0.57 |
| 5×Pd-c                   | -27.26                        | -5.45                                 | -4.40                              | 4.04                                     | 5.09                                        | 15 | 2     | 3.009 | -0.53 |
| 6×Pd-c                   | -31.69                        | -5.28                                 | -4.43                              | 4.21                                     | 5.06                                        | 18 | 4     | 3.060 | -0.49 |
| 7×Pd-c                   | -36.00                        | -5.14                                 | -4.31                              | 4.35                                     | 5.18                                        | 21 | 6     | 3.043 | -0.47 |
| 8×Pd-c                   | -40.35                        | -5.04                                 | -4.35                              | 4.45                                     | 5.14                                        | 24 | 8     | 3.061 | -0.45 |
| Three-dimensional mode d |                               |                                       |                                    |                                          |                                             |    |       |       |       |
| 4×Pd-d                   | -20.63                        | -5.16                                 | -2.28                              | 4.33                                     | 7.21                                        | 9  | 6     | 2.754 | -0.34 |
| 5×Pd-d                   | -24.83                        | -4.97                                 | -4.20                              | 4.52                                     | 5.29                                        | 12 | 8     | 2.838 | -0.33 |
| 6×Pd-d                   | -29.33                        | -4.89                                 | -4.50                              | 4.60                                     | 4.99                                        | 15 | 10    | 2.824 | -0.33 |
| 7×Pd-d                   | -33.76                        | -4.82                                 | -4.43                              | 4.67                                     | 5.06                                        | 18 | 12    | 2.836 | -0.34 |

**Table S7.** Adsorption energy [ $E(\text{Pt}_n/\text{ads})$ ; eV] (values in parentheses corrected by D3 method), average adsorption energy [ $E(\text{Pt}_{\text{ads}/\text{av}})$ ; eV], stepwise adsorption energy [ $\Delta E(\text{Pt}_{\text{ads}})$ ; eV], average aggregation energy [ $E_{\text{agg}}(\text{Pt}_{\text{ads}})$ ; eV], stepwise growth energy [ $E_{\text{growth}}(\text{Pt}_{\text{ads}})$ ; eV], coordination number (CN) with surface Mo atoms, number of Pt-Pt bond (NB-Pt), average Pt-Pt distance ( $d$ , Å), and average Bader charge ( $q$ , e) for  $\text{Pt}_n$  on  $\text{Mo}_2\text{C}(001)$ .

| Species                  | $E(\text{Pt}_n/\text{ads})$ | $E(\text{Pt}_{\text{ads}/\text{av}})$ | $\Delta E(\text{Pt}_{\text{ads}})$ | $E_{\text{agg}}(\text{Pt}_{\text{ads}})$ | $E_{\text{growth}}(\text{Pt}_{\text{ads}})$ | CN | NB-Pt | $d$   | $q$   |
|--------------------------|-----------------------------|---------------------------------------|------------------------------------|------------------------------------------|---------------------------------------------|----|-------|-------|-------|
| 1×Pt                     | -11.70                      | -11.70                                | -11.70                             | -                                        | -                                           | 3  | 0     | -     | -0.79 |
| Aggregation mode         |                             |                                       |                                    |                                          |                                             |    |       |       |       |
| 2×Pt                     | -17.95 (-13.94)             | -8.98                                 | -6.25                              | 2.73                                     | 5.45                                        | 6  | 1     | 3.006 | -0.70 |
| 3×Pt                     | -24.71                      | -8.24                                 | -6.76                              | 3.46                                     | 4.94                                        | 9  | 2     | 2.973 | -0.67 |
| 4×Pt                     | -31.07 (-28.27)             | -7.77                                 | -6.36                              | 3.93                                     | 5.34                                        | 12 | 4     | 3.050 | -0.62 |
| 5×Pt                     | -37.17                      | -7.43                                 | -6.10                              | 4.27                                     | 5.60                                        | 15 | 6     | 3.027 | -0.59 |
| 6×Pt                     | -43.51 (-42.00)             | -7.25                                 | -6.34                              | 4.45                                     | 5.36                                        | 18 | 9     | 2.999 | -0.57 |
| 7×Pt                     | -49.77                      | -7.11                                 | -6.26                              | 4.59                                     | 5.44                                        | 21 | 12    | 2.640 | -0.53 |
| Mode a                   |                             |                                       |                                    |                                          |                                             |    |       |       |       |
| 8×Pt-a                   | -56.30                      | -7.04                                 | -6.53                              | 4.66                                     | 5.17                                        | 24 | 14    | 2.974 | -0.54 |
| 9×Pt-a                   | -62.80                      | -6.98                                 | -6.50                              | 4.72                                     | 5.20                                        | 27 | 16    | 2.961 | -0.52 |
| 10×Pt-a                  | -69.35                      | -6.94                                 | -6.55                              | 4.77                                     | 5.15                                        | 30 | 19    | 3.000 | -0.53 |
| 11×Pt-a                  | -75.96                      | -6.91                                 | -6.61                              | 4.79                                     | 5.09                                        | 33 | 22    | 2.943 | -0.50 |
| 12×Pt-a                  | -82.64                      | -6.89                                 | -6.68                              | 4.81                                     | 5.02                                        | 36 | 26    | 2.927 | -0.47 |
| 13×Pt-a                  | -89.15                      | -6.86                                 | -6.51                              | 4.84                                     | 5.19                                        | 39 | 28    | 2.911 | -0.46 |
| 14×Pt-a                  | -95.78                      | -6.84                                 | -6.63                              | 4.86                                     | 5.07                                        | 42 | 33    | 2.887 | -0.43 |
| 15×Pt-a                  | -102.10                     | -6.81                                 | -6.32                              | 4.89                                     | 5.38                                        | 45 | 41    | 3.006 | -0.43 |
| 16×Pt-a                  | -108.75                     | -6.80                                 | -6.65                              | 4.90                                     | 5.05                                        | 48 | 45    | 2.998 | -0.41 |
| Mode b                   |                             |                                       |                                    |                                          |                                             |    |       |       |       |
| 8×Pt-b                   | -56.24                      | -7.03                                 | -6.47                              | 4.67                                     | 5.23                                        | 24 | 16    | 2.990 | -0.52 |
| 9×Pt-b                   | -62.31                      | -6.92                                 | -6.07                              | 4.78                                     | 5.63                                        | 27 | 18    | 2.920 | -0.49 |
| 10×Pt-b                  | -69.23                      | -6.92                                 | -6.92                              | 4.78                                     | 4.78                                        | 30 | 18    | 2.915 | -0.50 |
| 11×Pt-b                  | -75.81                      | -6.89                                 | -6.58                              | 4.81                                     | 5.12                                        | 33 | 20    | 2.926 | -0.50 |
| 12×Pt-b                  | -82.47                      | -6.87                                 | -6.66                              | 4.83                                     | 5.04                                        | 36 | 25    | 2.944 | -0.47 |
| 13×Pt-b                  | -89.13                      | -6.86                                 | -6.66                              | 4.84                                     | 5.04                                        | 39 | 29    | 2.949 | -0.45 |
| 14×Pt-b                  | -95.78                      | -6.84                                 | -6.65                              | 4.86                                     | 5.05                                        | 42 | 32    | 2.921 | -0.43 |
| 15×Pt-b                  | -102.16                     | -6.81                                 | -6.38                              | 4.89                                     | 5.32                                        | 45 | 36    | 2.947 | -0.42 |
| 16×Pt-b                  | -108.72                     | -6.80                                 | -6.56                              | 4.91                                     | 5.14                                        | 48 | 45    | 2.996 | -0.41 |
| Dispersion mode c        |                             |                                       |                                    |                                          |                                             |    |       |       |       |
| 2×Pt-c                   | -18.35                      | -9.18                                 | -6.65                              | 2.53                                     | 5.05                                        | 6  | 0     | -     | -0.75 |
| 3×Pt-c                   | -25.00                      | -8.33                                 | -6.65                              | 3.37                                     | 5.05                                        | 9  | 0     | -     | -0.76 |
| 4×Pt-c                   | -31.69 (-28.87)             | -7.92                                 | -6.69                              | 3.78                                     | 5.01                                        | 12 | 0     | -     | -0.76 |
| 5×Pt-c                   | -38.01                      | -7.60                                 | -6.32                              | 4.10                                     | 5.38                                        | 15 | 2     | 2.997 | -0.71 |
| 6×Pt-c                   | -44.38                      | -7.40                                 | -6.37                              | 4.30                                     | 5.33                                        | 18 | 4     | 3.054 | -0.66 |
| 7×Pt-c                   | -50.59                      | -7.23                                 | -6.21                              | 4.47                                     | 5.49                                        | 21 | 6     | 3.033 | -0.63 |
| 8×Pt-c                   | -56.84                      | -7.11                                 | -6.25                              | 4.60                                     | 5.45                                        | 24 | 8     | 3.055 | -0.60 |
| Three-dimensional mode d |                             |                                       |                                    |                                          |                                             |    |       |       |       |
| 4×Pt-d                   | -28.91 (-25.76)             | -7.23                                 | -4.38                              | 4.47                                     | 7.32                                        | 9  | 6     | 2.728 | -0.49 |
| 5×Pt-d                   | -34.89                      | -6.98                                 | -5.98                              | 4.72                                     | 5.72                                        | 12 | 8     | 2.889 | -0.49 |
| 6×Pt-d                   | -41.41 (-39.61)             | -6.90                                 | -6.52                              | 4.80                                     | 5.18                                        | 15 | 10    | 2.848 | -0.50 |
| 7×Pt-d                   | -47.94                      | -6.85                                 | -6.53                              | 4.85                                     | 5.17                                        | 18 | 12    | 2.804 | -0.48 |

**Table S8.** Adsorption energy [ $E(\text{Co}_{n/\text{ads}})$ ; eV], average adsorption energy [ $E(\text{Co}_{\text{ads}/\text{av}})$ ; eV], stepwise adsorption energy [ $\Delta E(\text{Co}_{\text{ads}})$ ; eV], average aggregation energy [ $E_{\text{agg}}(\text{Co}_{\text{ads}})$ ; eV], stepwise growth energy [ $E_{\text{growth}}(\text{Co}_{\text{ads}})$ ; eV], coordination number (CN) with surface Mo and C atoms, number of Co-Co bond (NB-Co), average Co-Co distance ( $d$ , Å), and average Bader charge ( $q$ , e) for  $\text{Co}_n$  on  $\text{Mo}_2\text{C}(101)$ .

| Species            | $E(\text{Co}_{n/\text{ads}})$ | $E(\text{Co}_{\text{ads}/\text{av}})$ | $\Delta E(\text{Co}_{\text{ads}})$ | $E_{\text{agg}}(\text{Co}_{\text{ads}})$ | $E_{\text{growth}}(\text{Co}_{\text{ads}})$ | CN-Mo | CN-C | NB-Co | $d$   | $q$  |
|--------------------|-------------------------------|---------------------------------------|------------------------------------|------------------------------------------|---------------------------------------------|-------|------|-------|-------|------|
| 1×Co               | -5.70                         | -5.70                                 | -5.70                              | -                                        | -                                           | 2     | 2    | 0     | -     | 0.20 |
| Dispersion mode a  |                               |                                       |                                    |                                          |                                             |       |      |       |       |      |
| 2×Co-a             | -11.44                        | -5.72                                 | -5.74                              | -0.02                                    | -0.04                                       | 4     | 4    | 0     | -     | 0.20 |
| 3×Co-a             | -17.13                        | -5.71                                 | -5.69                              | -0.01                                    | 0.01                                        | 6     | 6    | 0     | -     | 0.20 |
| 4×Co-a             | -22.88                        | -5.72                                 | -5.75                              | -0.02                                    | -0.05                                       | 8     | 8    | 0     | -     | 0.21 |
| 5×Co-a             | -28.33                        | -5.67                                 | -5.45                              | 0.03                                     | 0.25                                        | 10    | 10   | 0     | -     | 0.21 |
| 6×Co-a             | -33.79                        | -5.63                                 | -5.46                              | 0.07                                     | 0.24                                        | 12    | 12   | 0     | -     | 0.21 |
| 7×Co-a             | -39.24                        | -5.61                                 | -5.45                              | 0.09                                     | 0.25                                        | 14    | 14   | 0     | -     | 0.21 |
| 8×Co-a             | -44.69                        | -5.59                                 | -5.45                              | 0.11                                     | 0.25                                        | 16    | 16   | 0     | -     | 0.21 |
| Aggregation mode   |                               |                                       |                                    |                                          |                                             |       |      |       |       |      |
| 9×Co               | -48.66                        | -5.41                                 | -3.97                              | 0.29                                     | 1.73                                        | 20    | 17   | 1     | 2.375 | 0.19 |
| 10×Co              | -53.30                        | -5.33                                 | -4.64                              | 0.37                                     | 1.06                                        | 20    | 18   | 3     | 2.388 | 0.18 |
| Mode a             |                               |                                       |                                    |                                          |                                             |       |      |       |       |      |
| 11×Co-a            | -57.70                        | -5.25                                 | -4.40                              | 0.45                                     | 1.30                                        | 20    | 19   | 5     | 2.431 | 0.18 |
| 12×Co-a            | -61.76                        | -5.15                                 | -4.06                              | 0.55                                     | 1.64                                        | 24    | 19   | 8     | 2.466 | 0.15 |
| 13×Co-a            | -67.18                        | -5.17                                 | -5.42                              | 0.53                                     | 0.28                                        | 24    | 19   | 12    | 2.500 | 0.14 |
| 14×Co-a            | -71.57                        | -5.11                                 | -4.39                              | 0.59                                     | 1.31                                        | 28    | 19   | 15    | 2.483 | 0.12 |
| 15×Co-a            | -76.09                        | -5.07                                 | -4.52                              | 0.63                                     | 1.18                                        | 27    | 20   | 17    | 2.496 | 0.12 |
| 16×Co-a            | -81.27                        | -5.08                                 | -5.18                              | 0.62                                     | 0.52                                        | 31    | 20   | 21    | 2.498 | 0.10 |
| 17×Co-a            | -86.50                        | -5.09                                 | -5.23                              | 0.61                                     | 0.47                                        | 31    | 20   | 25    | 2.491 | 0.09 |
| 18×Co-a            | -91.75                        | -5.10                                 | -5.25                              | 0.60                                     | 0.45                                        | 35    | 21   | 29    | 2.464 | 0.09 |
| 28×Co-a            | -136.97                       | -4.89                                 |                                    | 0.81                                     |                                             | 60    | 26   | 49    | 2.471 | 0.06 |
| Mode b             |                               |                                       |                                    |                                          |                                             |       |      |       |       |      |
| 11×Co-b            | -57.19                        | -5.20                                 | -3.89                              | 0.50                                     | 1.81                                        | 14    | 17   | 5     | 2.387 | 0.16 |
| 12×Co-b            | -62.21                        | -5.18                                 | -5.02                              | 0.52                                     | 0.68                                        | 15    | 18   | 8     | 2.366 | 0.14 |
| 13×Co-b            | -66.46                        | -5.11                                 | -4.25                              | 0.59                                     | 1.45                                        | 17    | 19   | 10    | 2.411 | 0.13 |
| 14×Co-b            | -70.88                        | -5.06                                 | -4.42                              | 0.64                                     | 1.28                                        | 20    | 19   | 13    | 2.414 | 0.11 |
| 15×Co-b            | -76.38                        | -5.09                                 | -5.50                              | 0.61                                     | 0.20                                        | 25    | 20   | 14    | 2.418 | 0.11 |
| 16×Co-b            | -81.37                        | -5.09                                 | -4.99                              | 0.61                                     | 0.71                                        | 24    | 21   | 21    | 2.483 | 0.11 |
| 17×Co-b            | -86.40                        | -5.08                                 | -5.03                              | 0.62                                     | 0.67                                        | 25    | 21   | 25    | 2.472 | 0.10 |
| 18×Co-b            | -91.75                        | -5.10                                 | -5.35                              | 0.60                                     | 0.35                                        | 25    | 21   | 28    | 2.467 | 0.09 |
| 28×Co-b            | -136.89                       | -4.89                                 |                                    | 0.81                                     |                                             | 63    | 25   | 50    | 2.491 | 0.06 |
| Aggregation mode c |                               |                                       |                                    |                                          |                                             |       |      |       |       |      |
| 2×Co-c             | -9.60                         | -4.80                                 | -3.90                              | 0.90                                     | 1.80                                        | 6     | 3    | 1     | 2.365 | 0.11 |
| 3×Co-c             | -13.66                        | -4.55                                 | -4.06                              | 1.15                                     | 1.64                                        | 6     | 4    | 2     | 2.350 | 0.09 |
| 4×Co-c             | -19.79                        | -4.95                                 | -6.13                              | 0.75                                     | -0.43                                       | 8     | 6    | 3     | 2.594 | 0.13 |

**Table S9.** Adsorption energy [ $E(\text{Ni}_{n/\text{ads}})$ ; eV], average adsorption energy [ $E(\text{Ni}_{\text{ads}/\text{av}})$ ; eV], stepwise adsorption energy [ $\Delta E(\text{Ni}_{\text{ads}})$ ; eV], average aggregation energy [ $E_{\text{agg}}(\text{Ni}_{\text{ads}})$ ; eV], stepwise growth energy [ $E_{\text{growth}}(\text{Ni}_{\text{ads}})$ ; eV], coordination number (CN) with surface Mo and C atoms, number of Ni-Ni bond (NB-Ni), average Ni-Ni distance ( $d$ , Å), and average Bader charge ( $q$ , e) for  $\text{Ni}_n$  on  $\text{Mo}_2\text{C}(101)$ .

| Species            | $E(\text{Ni}_{n/\text{ads}})$ | $E(\text{Ni}_{\text{ads}/\text{av}})$ | $\Delta E(\text{Ni}_{\text{ads}})$ | $E_{\text{agg}}(\text{Ni}_{\text{ads}})$ | $E_{\text{growth}}(\text{Ni}_{\text{ads}})$ | CN-Mo | CN-C | NB-Ni | $d$   | $q$  |
|--------------------|-------------------------------|---------------------------------------|------------------------------------|------------------------------------------|---------------------------------------------|-------|------|-------|-------|------|
| 1×Ni               | -5.48                         | -5.48                                 | -5.48                              | –                                        | –                                           | 2     | 2    | 0     | –     | 0.18 |
| Dispersion mode a  |                               |                                       |                                    |                                          |                                             |       |      |       |       |      |
| 2×Ni-a             | -10.95                        | -5.48                                 | -5.47                              | 0.01                                     | 0.01                                        | 4     | 4    | 0     | –     | 0.18 |
| 3×Ni-a             | -16.38                        | -5.46                                 | -5.43                              | -0.02                                    | 0.05                                        | 6     | 6    | 0     | –     | 0.18 |
| 4×Ni-a             | -21.83                        | -5.46                                 | -5.45                              | 0.02                                     | 0.03                                        | 8     | 8    | 0     | –     | 0.18 |
| 5×Ni-a             | -27.17                        | -5.43                                 | -5.34                              | 0.05                                     | 0.14                                        | 10    | 10   | 0     | –     | 0.18 |
| 6×Ni-a             | -32.55                        | -5.43                                 | -5.38                              | 0.06                                     | 0.10                                        | 12    | 12   | 0     | –     | 0.18 |
| 7×Ni-a             | -37.89                        | -5.41                                 | -5.34                              | 0.07                                     | 0.14                                        | 14    | 14   | 0     | –     | 0.18 |
| 8×Ni-a             | -43.26                        | -5.41                                 | -5.37                              | 0.07                                     | 0.11                                        | 16    | 16   | 0     | –     | 0.17 |
| Aggregation mode   |                               |                                       |                                    |                                          |                                             |       |      |       |       |      |
| 9×Ni               | -47.22                        | -5.25                                 | -3.96                              | 0.23                                     | 1.52                                        | 18    | 17   | 1     | 2.438 | 0.16 |
| 10×Ni              | -51.54                        | -5.15                                 | -4.32                              | 0.33                                     | 1.16                                        | 20    | 18   | 3     | 2.490 | 0.16 |
| Mode a             |                               |                                       |                                    |                                          |                                             |       |      |       |       |      |
| 11×Ni-a            | -55.80                        | -5.07                                 | -4.26                              | 0.41                                     | 1.22                                        | 24    | 19   | 5     | 2.533 | 0.15 |
| 12×Ni-a            | -60.06                        | -5.01                                 | -4.26                              | 0.48                                     | 1.22                                        | 25    | 19   | 8     | 2.556 | 0.13 |
| Mode b             |                               |                                       |                                    |                                          |                                             |       |      |       |       |      |
| 11×Ni-b            | -55.75                        | -5.07                                 | -4.21                              | 0.41                                     | 1.27                                        | 22    | 18   | 6     | 2.563 | 0.13 |
| 12×Ni-b            | -60.13                        | -5.01                                 | -4.38                              | 0.47                                     | 1.10                                        | 23    | 18   | 8     | 2.582 | 0.12 |
| Aggregation mode   |                               |                                       |                                    |                                          |                                             |       |      |       |       |      |
| 13×Ni              | -64.76                        | -4.98                                 | -4.70                              | 0.50                                     | 0.78                                        | 26    | 19   | 12    | 2.580 | 0.11 |
| 14×Ni              | -69.15                        | -4.94                                 | -4.39                              | 0.54                                     | 1.09                                        | 30    | 19   | 15    | 2.555 | 0.10 |
| 15×Ni              | -73.71                        | -4.91                                 | -4.56                              | 0.57                                     | 0.92                                        | 27    | 20   | 19    | 2.606 | 0.10 |
| 16×Ni              | -78.18                        | -4.89                                 | -4.47                              | 0.59                                     | 1.01                                        | 31    | 20   | 22    | 2.587 | 0.08 |
| 17×Ni              | -83.19                        | -4.89                                 | -5.01                              | 0.59                                     | 0.47                                        | 33    | 20   | 26    | 2.554 | 0.07 |
| 18×Ni              | -87.94                        | -4.89                                 | -4.75                              | 0.59                                     | 0.73                                        | 35    | 21   | 30    | 2.518 | 0.07 |
| 28×Ni              | -131.74                       | -4.71                                 |                                    | 0.78                                     |                                             | 60    | 36   | 47    | 2.497 | 0.03 |
| Aggregation mode c |                               |                                       |                                    |                                          |                                             |       |      |       |       |      |
| 2×Ni-c             | -9.38                         | -4.69                                 | -3.90                              | 0.79                                     | 1.58                                        | 4     | 3    | 1     | 2.446 | 0.10 |
| 3×Ni-c             | -13.27                        | -4.42                                 | -3.89                              | 1.06                                     | 1.59                                        | 6     | 4    | 2     | 2.449 | 0.08 |
| 4×Ni-c             | -19.14                        | -4.79                                 | -5.87                              | 0.70                                     | -0.39                                       | 9     | 6    | 3     | 2.474 | 0.11 |

**Table S10.** Adsorption energy [ $E(\text{Cu}_n/\text{ads})$ ; eV] (values in parentheses corrected by D3 method), average adsorption energy [ $E(\text{Cu}_{\text{ads}/\text{av}})$ ; eV], stepwise adsorption energy [ $\Delta E(\text{Cu}_{\text{ads}})$ ; eV], average aggregation energy [ $E_{\text{agg}}(\text{Cu}_{\text{ads}})$ ; eV], stepwise growth energy [ $E_{\text{growth}}(\text{Cu}_{\text{ads}})$ ; eV], coordination number (CN) with surface Mo and C atoms, number of Cu-Cu bond (NB-Cu), average Cu-Cu distance ( $d$ , Å), and average Bader charge ( $q$ , e) for  $\text{Cu}_n$  on  $\text{Mo}_2\text{C}(101)$ .

| Species            | $E(\text{Cu}_n/\text{ads})$ | $E(\text{Cu}_{\text{ads}/\text{av}})$ | $\Delta E(\text{Cu}_{\text{ads}})$ | $E_{\text{agg}}(\text{Cu}_{\text{ads}})$ | $E_{\text{growth}}(\text{Cu}_{\text{ads}})$ | CN-Mo | CN-C | NB-Cu | $d$   | $q$  |
|--------------------|-----------------------------|---------------------------------------|------------------------------------|------------------------------------------|---------------------------------------------|-------|------|-------|-------|------|
| 1×Cu               | -3.72                       | -3.72                                 | -3.72                              | -                                        | -                                           | 2     | 2    | 0     | -     | 0.26 |
| Dispersion mode a  |                             |                                       |                                    |                                          |                                             |       |      |       |       |      |
| 2×Cu-a             | -7.43                       | -3.72                                 | -3.71                              | 0.01                                     | 0.01                                        | 4     | 4    | 0     | -     | 0.26 |
| 3×Cu-a             | -11.09                      | -3.70                                 | -3.66                              | 0.02                                     | 0.06                                        | 6     | 6    | 0     | -     | 0.27 |
| 4×Cu-a             | -14.76 (-9.82)              | -3.69                                 | -3.67                              | 0.03                                     | 0.05                                        | 8     | 8    | 0     | -     | 0.27 |
| 5×Cu-a             | -18.38                      | -3.68                                 | -3.62                              | 0.04                                     | 0.10                                        | 10    | 10   | 0     | -     | 0.26 |
| 6×Cu-a             | -22.01                      | -3.67                                 | -3.63                              | 0.05                                     | 0.09                                        | 12    | 12   | 0     | -     | 0.26 |
| 7×Cu-a             | -25.59                      | -3.66                                 | -3.58                              | 0.06                                     | 0.14                                        | 14    | 14   | 0     | -     | 0.25 |
| 8×Cu-a             | -29.18 (-26.34)             | -3.65                                 | -3.59                              | 0.07                                     | 0.13                                        | 16    | 16   | 0     | -     | 0.25 |
| Aggregation mode a |                             |                                       |                                    |                                          |                                             |       |      |       |       |      |
| 9×Cu-a             | -31.79                      | -3.53                                 | -2.61                              | 0.19                                     | 1.11                                        | 18    | 17   | 1     | 2.444 | 0.24 |
| 10×Cu-a            | -34.90                      | -3.49                                 | -3.11                              | 0.23                                     | 0.61                                        | 20    | 17   | 3     | 2.471 | 0.20 |
| 11×Cu-a            | -38.35                      | -3.49                                 | -3.45                              | 0.23                                     | 0.27                                        | 21    | 18   | 7     | 2.618 | 0.20 |
| 12×Cu-a            | -41.63                      | -3.47                                 | -3.28                              | 0.25                                     | 0.44                                        | 22    | 18   | 10    | 2.615 | 0.17 |
| 13×Cu-a            | -45.08                      | -3.47                                 | -3.45                              | 0.25                                     | 0.27                                        | 24    | 19   | 12    | 2.597 | 0.17 |
| Mode b             |                             |                                       |                                    |                                          |                                             |       |      |       |       |      |
| 9×Cu-b             | -31.82                      | -3.54                                 | -2.64                              | 0.18                                     | 1.08                                        | 18    | 16   | 1     | 2.443 | 0.22 |
| 10×Cu-b            | -34.88                      | -3.49                                 | -3.06                              | 0.23                                     | 0.66                                        | 20    | 16   | 3     | 2.496 | 0.19 |
| 11×Cu-b            | -38.01                      | -3.46                                 | -3.13                              | 0.26                                     | 0.59                                        | 21    | 16   | 9     | 2.611 | 0.18 |
| 12×Cu-b            | -41.63                      | -3.47                                 | -3.62                              | 0.25                                     | 0.10                                        | 23    | 18   | 8     | 2.501 | 0.17 |
| 13×Cu-b            | -45.08                      | -3.47                                 | -3.45                              | 0.25                                     | 0.14                                        | 23    | 19   | 14    | 2.625 | 0.17 |
| Mode c             |                             |                                       |                                    |                                          |                                             |       |      |       |       |      |
| 9×Cu-c             | -31.90 (-29.44)             | -3.54                                 | -2.72                              | 0.18                                     | 1.00                                        | 17    | 16   | 2     | 2.456 | 0.22 |
| 10×Cu-c            | -34.82                      | -3.48                                 | -2.92                              | 0.24                                     | 0.80                                        | 18    | 16   | 5     | 2.507 | 0.20 |
| 11×Cu-c            | -38.17                      | -3.47                                 | -3.35                              | 0.25                                     | 0.37                                        | 20    | 17   | 7     | 2.582 | 0.18 |
| 12×Cu-c            | -41.63                      | -3.47                                 | -3.46                              | 0.25                                     | 0.26                                        | 22    | 18   | 11    | 2.630 | 0.17 |
| Aggregation mode   |                             |                                       |                                    |                                          |                                             |       |      |       |       |      |
| 14×Cu              | -48.27                      | -3.45                                 | -3.19                              | 0.27                                     | 0.53                                        | 24    | 19   | 15    | 2.588 | 0.15 |
| 15×Cu              | -51.74                      | -3.45                                 | -3.47                              | 0.27                                     | 0.25                                        | 26    | 20   | 19    | 2.628 | 0.14 |
| 16×Cu              | -55.02                      | -3.44                                 | -3.28                              | 0.28                                     | 0.44                                        | 27    | 20   | 22    | 2.621 | 0.13 |
| 17×Cu              | -58.66                      | -3.45                                 | -3.64                              | 0.27                                     | 0.08                                        | 27    | 20   | 26    | 2.650 | 0.12 |
| 18×Cu              | -62.17                      | -3.45                                 | -3.51                              | 0.27                                     | 0.21                                        | 28    | 18   | 32    | 2.553 | 0.10 |
| 28×Cu              | -94.53                      | -3.38                                 |                                    | 0.34                                     |                                             | 35    | 22   | 54    | 2.584 | 0.05 |
| Aggregated mode d  |                             |                                       |                                    |                                          |                                             |       |      |       |       |      |
| 2×Cu-d             | -6.40 (-0.34)               | -3.20                                 | -2.68                              | 0.52                                     | 1.04                                        | 4     | 2    | 1     | 2.459 | 0.12 |
| 3×Cu-d             | -9.12                       | -3.04                                 | -2.72                              | 0.68                                     | 1.00                                        | 6     | 3    | 2     | 2.542 | 0.09 |
| 4×Cu-d             | -13.15 (-8.04)              | -3.29                                 | -4.03                              | 0.43                                     | -0.31                                       | 8     | 5    | 3     | 2.408 | 0.11 |

**Table S11.** Adsorption energy [ $E(\text{Pd}_{n/\text{ads}})$ ; eV], average adsorption energy [ $E(\text{Pd}_{\text{ads}/\text{av}})$ ; eV], stepwise adsorption energy [ $\Delta E(\text{Pd}_{\text{ads}})$ ; eV], average aggregation energy [ $E_{\text{agg}}(\text{Pd}_{\text{ads}})$ ; eV], stepwise growth energy [ $E_{\text{growth}}(\text{Pd}_{\text{ads}})$ ; eV], coordination number (CN) with surface Mo and C atoms, number of Pd-Pd bond (NB-Pd), average Pd-Pd distance ( $d$ , Å), and average Bader charge ( $q$ , e) for  $\text{Pd}_n$  on  $\text{Mo}_2\text{C}(101)$ .

| Species            | $E(\text{Pd}_{n/\text{ads}})$ | $E(\text{Pd}_{\text{ads}/\text{av}})$ | $\Delta E(\text{Pd}_{\text{ads}})$ | $E_{\text{agg}}(\text{Pd}_{\text{ads}})$ | $E_{\text{growth}}(\text{Pd}_{\text{ads}})$ | CN-Mo | CN-C | NB-Pd | $d$   | $q$   |
|--------------------|-------------------------------|---------------------------------------|------------------------------------|------------------------------------------|---------------------------------------------|-------|------|-------|-------|-------|
| 1×Pd               | -10.78                        | -10.78                                | -10.78                             | –                                        | –                                           | 2     | 2    | 0     | –     | -0.01 |
| Dispersion mode a  |                               |                                       |                                    |                                          |                                             |       |      |       |       |       |
| 2×Pd-a             | -14.81                        | -7.41                                 | -4.03                              | 3.38                                     | 6.75                                        | 4     | 4    | 0     | –     | -0.03 |
| 3×Pd-a             | -18.83                        | -6.28                                 | -4.02                              | 4.50                                     | 6.76                                        | 6     | 6    | 0     | –     | -0.04 |
| 4×Pd-a             | -22.89                        | -5.72                                 | -4.06                              | 5.06                                     | 6.72                                        | 8     | 8    | 0     | –     | -0.05 |
| 5×Pd-a             | -26.82                        | -5.36                                 | -3.93                              | 5.42                                     | 6.85                                        | 10    | 10   | 0     | –     | -0.04 |
| 6×Pd-a             | -30.81                        | -5.14                                 | -3.99                              | 5.65                                     | 6.79                                        | 12    | 12   | 0     | –     | -0.04 |
| 7×Pd-a             | -34.80                        | -4.97                                 | -3.99                              | 5.81                                     | 6.79                                        | 14    | 14   | 0     | –     | -0.04 |
| 8×Pd-a             | -38.81                        | -4.85                                 | -4.01                              | 5.93                                     | 6.77                                        | 16    | 16   | 0     | –     | -0.04 |
| Aggregation mode a |                               |                                       |                                    |                                          |                                             |       |      |       |       |       |
| 9×Pd-a             | -42.22                        | -4.69                                 | -3.41                              | 6.09                                     | 7.37                                        | 18    | 17   | 1     | 2.763 | -0.05 |
| 10×Pd-a            | -45.87                        | -4.59                                 | -3.65                              | 6.19                                     | 7.13                                        | 20    | 18   | 3     | 2.815 | -0.04 |
| 11×Pd-a            | -49.62                        | -4.51                                 | -3.75                              | 6.27                                     | 7.03                                        | 15    | 18   | 7     | 2.824 | -0.05 |
| 12×Pd-a            | -53.52                        | -4.46                                 | -3.90                              | 6.32                                     | 6.88                                        | 15    | 18   | 11    | 2.814 | -0.05 |
| Mode b             |                               |                                       |                                    |                                          |                                             |       |      |       |       |       |
| 9×Pd-b             | -42.10                        | -4.68                                 | -3.29                              | 6.10                                     | 7.49                                        | 18    | 16   | 1     | 2.931 | -0.04 |
| 10×Pd-b            | -45.66                        | -4.57                                 | -3.56                              | 6.21                                     | 7.22                                        | 20    | 17   | 3     | 2.700 | -0.06 |
| 11×Pd-b            | -49.62                        | -4.51                                 | -3.96                              | 6.27                                     | 6.82                                        | 15    | 18   | 7     | 2.825 | -0.05 |
| Mode c             |                               |                                       |                                    |                                          |                                             |       |      |       |       |       |
| 9×Pd-c             | -42.08                        | -4.68                                 | -3.27                              | 6.10                                     | 7.51                                        | 17    | 16   | 2     | 2.703 | -0.05 |
| 10×Pd-c            | -45.70                        | -4.57                                 | -3.62                              | 6.21                                     | 7.16                                        | 18    | 16   | 5     | 2.751 | -0.06 |
| 11×Pd-c            | -49.62                        | -4.51                                 | -3.92                              | 6.27                                     | 6.86                                        | 18    | 17   | 8     | 2.436 | -0.06 |
| 12×Pd-c            | -53.52                        | -4.46                                 | -3.90                              | 6.32                                     | 6.88                                        | 15    | 18   | 11    | 2.813 | -0.06 |
| Aggregation mode   |                               |                                       |                                    |                                          |                                             |       |      |       |       |       |
| 13×Pd              | -57.44                        | -4.42                                 | -3.92                              | 6.36                                     | 6.86                                        | 16    | 19   | 14    | 2.822 | -0.05 |
| 14×Pd              | -61.35                        | -4.38                                 | -3.91                              | 6.40                                     | 6.87                                        | 17    | 19   | 18    | 2.823 | -0.06 |
| 15×Pd              | -65.43                        | -4.36                                 | -4.08                              | 6.42                                     | 6.70                                        | 23    | 20   | 19    | 2.840 | -0.06 |
| 16×Pd              | -69.73                        | -4.36                                 | -4.30                              | 6.42                                     | 6.48                                        | 28    | 20   | 20    | 2.831 | -0.06 |
| 24×Pd              | -100.22                       | -4.18                                 |                                    | 6.60                                     |                                             | 40    | 24   | 40    | 2.866 | -0.08 |
| Aggregation mode d |                               |                                       |                                    |                                          |                                             |       |      |       |       |       |
| 2×Pd-d             | -14.09                        | -7.05                                 | -4.60                              | 3.74                                     | 6.18                                        | 4     | 3    | 1     | 2.889 | -0.07 |
| 3×Pd-d             | -17.33                        | -5.78                                 | -3.24                              | 5.00                                     | 7.54                                        | 6     | 4    | 2     | 2.846 | -0.07 |
| 4×Pd-d             | -21.64                        | -5.41                                 | -4.31                              | 5.37                                     | 6.47                                        | 8     | 6    | 3     | 2.788 | -0.06 |

**Table S12.** Adsorption energy [ $E(\text{Pt}_{n/\text{ads}})$ ; eV] (values in parentheses corrected by D3 method), average adsorption energy [ $E(\text{Pt}_{\text{ads}/\text{av}})$ ; eV], stepwise adsorption energy [ $\Delta E(\text{Pt}_{\text{ads}})$ ; eV], average aggregation energy [ $E_{\text{agg}}(\text{Pt}_{\text{ads}})$ ; eV], stepwise growth energy [ $E_{\text{growth}}(\text{Pt}_{\text{ads}})$ ; eV], coordination number (CN) with surface Mo and C atoms, number of Pt-Pt bond (NB-Pt), average Pt-Pt distance ( $d$ , Å), and average Bader charge ( $q$ , e) for  $\text{Pt}_n$  on  $\text{Mo}_2\text{C}(101)$ .

| Species            | $E(\text{Pt}_{n/\text{ads}})$ | $E(\text{Pt}_{\text{ads}/\text{av}})$ | $\Delta E(\text{Pt}_{\text{ads}})$ | $E_{\text{agg}}(\text{Pt}_{\text{ads}})$ | $E_{\text{growth}}(\text{Pt}_{\text{ads}})$ | CN-Mo | CN-C | NB-Pt | $d$   | $q$   |
|--------------------|-------------------------------|---------------------------------------|------------------------------------|------------------------------------------|---------------------------------------------|-------|------|-------|-------|-------|
| 1×Pt               | -12.48                        | -12.48                                | -12.48                             | –                                        | –                                           | 2     | 2    | 0     | –     | -0.25 |
| Dispersion mode a  |                               |                                       |                                    |                                          |                                             |       |      |       |       |       |
| 2×Pt-a             | -18.24(-12.75)                | -9.12                                 | -5.76                              | 3.36                                     | 6.72                                        | 4     | 4    | 0     | –     | -0.25 |
| 3×Pt-a             | -23.94                        | -7.98                                 | -5.70                              | 4.50                                     | 6.78                                        | 6     | 6    | 0     | –     | -0.24 |
| 4×Pt-a             | -29.68(-25.57)                | -7.42                                 | -5.74                              | 5.06                                     | 6.74                                        | 8     | 8    | 0     | –     | -0.23 |
| 5×Pt-a             | -35.26                        | -7.05                                 | -5.58                              | 5.43                                     | 6.90                                        | 10    | 10   | 0     | –     | -0.23 |
| 6×Pt-a             | -40.90                        | -6.82                                 | -5.64                              | 5.66                                     | 6.84                                        | 12    | 12   | 0     | –     | -0.22 |
| 7×Pt-a             | -46.50                        | -6.64                                 | -5.60                              | 5.84                                     | 6.88                                        | 14    | 14   | 0     | –     | -0.21 |
| 8×Pt-a             | -52.06                        | -6.51                                 | -5.56                              | 5.97                                     | 6.92                                        | 16    | 16   | 0     | –     | -0.21 |
| Aggregation mode a |                               |                                       |                                    |                                          |                                             |       |      |       |       |       |
| 9×Pt-a             | -57.06                        | -6.34                                 | -5.00                              | 6.14                                     | 7.48                                        | 18    | 17   | 1     | 2.672 | -0.21 |
| 10×Pt-a            | -62.31                        | -6.23                                 | -5.25                              | 6.25                                     | 7.23                                        | 20    | 17   | 3     | 2.686 | -0.21 |
| 11×Pt-a            | -67.54                        | -6.14                                 | -5.23                              | 6.34                                     | 7.25                                        | 22    | 18   | 6     | 2.769 | -0.20 |
| 12×Pt-a            | -73.43                        | -6.12                                 | -5.89                              | 6.36                                     | 6.59                                        | 23    | 18   | 11    | 2.747 | -0.17 |
| 13×Pt-a            | -79.31                        | -6.10                                 | -5.88                              | 6.38                                     | 6.60                                        | 25    | 18   | 16    | 2.767 | -0.16 |
| Mode b             |                               |                                       |                                    |                                          |                                             |       |      |       |       |       |
| 9×Pt-b             | -56.88                        | -6.32                                 | -4.82                              | 6.16                                     | 7.66                                        | 18    | 16   | 1     | 2.659 | -0.21 |
| 10×Pt-b            | -62.31                        | -6.23                                 | -5.43                              | 6.25                                     | 7.05                                        | 20    | 16   | 3     | 2.686 | -0.21 |
| Mode c             |                               |                                       |                                    |                                          |                                             |       |      |       |       |       |
| 9×Pt-c             | -57.16(-56.36)                | -6.35                                 | -5.10                              | 6.13                                     | 7.38                                        | 16    | 16   | 2     | 2.614 | -0.20 |
| 10×Pt-c            | -62.51                        | -6.25                                 | -5.35                              | 6.23                                     | 7.13                                        | 20    | 16   | 6     | 2.736 | -0.19 |
| 11×Pt-c            | -67.97                        | -6.18                                 | -5.46                              | 6.30                                     | 7.02                                        | 22    | 17   | 8     | 2.734 | -0.18 |
| 12×Pt-c            | -73.56                        | -6.13                                 | -5.59                              | 6.35                                     | 6.89                                        | 24    | 17   | 12    | 2.755 | -0.18 |
| 13×Pt-c            | -79.31                        | -6.10                                 | -5.75                              | 6.38                                     | 6.73                                        | 25    | 18   | 16    | 2.767 | -0.16 |
| Aggregation mode   |                               |                                       |                                    |                                          |                                             |       |      |       |       |       |
| 14×Pt              | -84.84                        | -6.06                                 | -5.53                              | 6.42                                     | 6.95                                        | 24    | 19   | 20    | 2.768 | -0.15 |
| 15×Pt              | -90.67                        | -6.04                                 | -5.83                              | 6.44                                     | 6.65                                        | 30    | 19   | 22    | 2.762 | -0.14 |
| 16×Pt              | -96.65                        | -6.04                                 | -5.98                              | 6.44                                     | 6.50                                        | 27    | 20   | 26    | 2.783 | -0.13 |
| 25×Pt              | -147.01                       | -5.88                                 |                                    | 6.60                                     |                                             | 45    | 17   | 48    | 2.762 | -0.17 |
| Aggregation mode d |                               |                                       |                                    |                                          |                                             |       |      |       |       |       |
| 2×Pt-d             | -17.45(-11.78)                | -8.73                                 | -4.97                              | 3.76                                     | 7.51                                        | 6     | 3    | 1     | 2.636 | -0.27 |
| 3×Pt-d             | -22.13                        | -7.38                                 | -4.68                              | 5.10                                     | 7.80                                        | 8     | 4    | 2     | 2.687 | -0.24 |
| 4×Pt-d             | -27.45(-22.89)                | -6.86                                 | -5.32                              | 5.62                                     | 7.16                                        | 8     | 3    | 3     | 2.684 | -0.28 |

**Table S13.** Adsorption energy [ $E(\text{Co}_{n/\text{ads}})$ ; eV], average adsorption energy [ $E(\text{Co}_{\text{ads}/\text{av}})$ ; eV], stepwise adsorption energy [ $\Delta E(\text{Co}_{\text{ads}})$ ; eV], average aggregation energy [ $E_{\text{agg}}(\text{Co}_{\text{ads}})$ ; eV], stepwise growth energy [ $E_{\text{growth}}(\text{Co}_{\text{ads}})$ ; eV], coordination number (CN) with surface Mo and C atoms, number of Co-Co bond (NB-Co), average Co-Co distance ( $d$ , Å), and average Bader charge ( $q$ , e) for  $\text{Co}_n$  on MoC(001).

| Species                  | $E(\text{Co}_{n/\text{ads}})$ | $E(\text{Co}_{\text{ads}/\text{av}})$ | $\Delta E(\text{Co}_{\text{ads}})$ | $E_{\text{agg}}(\text{Co}_{\text{ads}})$ | $E_{\text{growth}}(\text{Co}_{\text{ads}})$ | CN-Mo | CN-C | NB-Co | $d$   | $q$  |
|--------------------------|-------------------------------|---------------------------------------|------------------------------------|------------------------------------------|---------------------------------------------|-------|------|-------|-------|------|
| 1×Co                     | -4.71                         | -4.71                                 | -4.71                              | -                                        | -                                           | 2     | 2    | -     | -     | 0.21 |
| Aggregation mode         |                               |                                       |                                    |                                          |                                             |       |      |       |       |      |
| 2×Co                     | -9.41                         | -4.71                                 | -4.70                              | 0.00                                     | 0.01                                        | 4     | 4    | 1     | 2.373 | 0.20 |
| 3×Co                     | -14.36                        | -4.79                                 | -4.95                              | -0.08                                    | -0.24                                       | 6     | 6    | 2     | 2.560 | 0.21 |
| 4×Co                     | -19.92                        | -4.98                                 | -5.56                              | -0.27                                    | -0.85                                       | 8     | 8    | 4     | 2.410 | 0.27 |
| Mode a                   |                               |                                       |                                    |                                          |                                             |       |      |       |       |      |
| 5×Co-a                   | -23.77                        | -4.75                                 | -3.85                              | -0.04                                    | 0.86                                        | 10    | 10   | 5     | 2.381 | 0.22 |
| 6×Co-a                   | -28.09                        | -4.68                                 | -4.32                              | 0.03                                     | 0.39                                        | 12    | 12   | 6     | 2.389 | 0.22 |
| 7×Co-a                   | -33.40                        | -4.77                                 | -5.31                              | -0.06                                    | -0.60                                       | 14    | 14   | 8     | 2.426 | 0.24 |
| 8×Co-a                   | -37.83                        | -4.73                                 | -4.43                              | -0.02                                    | 0.28                                        | 16    | 15   | 11    | 2.445 | 0.21 |
| 9×Co-a                   | -42.67                        | -4.74                                 | -4.84                              | -0.03                                    | -0.13                                       | 18    | 16   | 12    | 2.460 | 0.19 |
| 10×Co-a                  | -47.66                        | -4.77                                 | -4.99                              | -0.06                                    | -0.28                                       | 20    | 18   | 17    | 2.490 | 0.19 |
| 11×Co-a                  | -52.47                        | -4.77                                 | -4.81                              | -0.06                                    | -0.10                                       | 22    | 19   | 21    | 2.508 | 0.17 |
| 12×Co-a                  | -57.62                        | -4.80                                 | -5.15                              | -0.09                                    | -0.44                                       | 24    | 20   | 24    | 2.501 | 0.16 |
| 13×Co-a                  | -62.17                        | -4.78                                 | -4.55                              | -0.07                                    | 0.16                                        | 24    | 20   | 29    | 2.471 | 0.15 |
| 14×Co-a                  | -66.81                        | -4.77                                 | -4.64                              | -0.06                                    | 0.07                                        | 24    | 20   | 34    | 2.475 | 0.14 |
| 15×Co-a                  | -71.46                        | -4.76                                 | -4.65                              | -0.05                                    | 0.06                                        | 24    | 20   | 39    | 2.461 | 0.13 |
| 16×Co-a                  | -76.07                        | -4.75                                 | -4.61                              | -0.04                                    | 0.10                                        | 24    | 20   | 43    | 2.460 | 0.12 |
| Mode b                   |                               |                                       |                                    |                                          |                                             |       |      |       |       |      |
| 5×Co-b                   | -23.88                        | -4.78                                 | -3.96                              | -0.07                                    | 0.75                                        | 10    | 10   | 5     | 2.460 | 0.21 |
| 6×Co-b                   | -28.18                        | -4.70                                 | -4.30                              | 0.01                                     | 0.41                                        | 12    | 12   | 7     | 2.467 | 0.21 |
| 7×Co-b                   | -32.84                        | -4.69                                 | -4.66                              | 0.02                                     | 0.05                                        | 14    | 14   | 9     | 2.503 | 0.19 |
| 8×Co-b                   | -38.55                        | -4.82                                 | -5.71                              | -0.11                                    | -1.00                                       | 16    | 16   | 12    | 2.532 | 0.25 |
| 9×Co-b                   | -43.17                        | -4.80                                 | -4.62                              | -0.09                                    | 0.09                                        | 18    | 17   | 14    | 2.535 | 0.21 |
| 10×Co-b                  | -47.77                        | -4.78                                 | -4.60                              | -0.07                                    | 0.11                                        | 20    | 18   | 17    | 2.490 | 0.19 |
| 11×Co-b                  | -52.61                        | -4.78                                 | -4.84                              | -0.07                                    | -0.13                                       | 22    | 19   | 21    | 2.540 | 0.18 |
| 12×Co-b                  | -57.54                        | -4.80                                 | -4.93                              | -0.09                                    | -0.22                                       | 24    | 20   | 22    | 2.480 | 0.17 |
| 13×Co-b                  | -61.42                        | -4.72                                 | -3.88                              | -0.01                                    | 0.83                                        | 24    | 20   | 29    | 2.497 | 0.16 |
| 14×Co-b                  | -66.87                        | -4.78                                 | -5.45                              | -0.07                                    | -0.74                                       | 24    | 20   | 37    | 2.535 | 0.16 |
| 15×Co-b                  | -71.38                        | -4.76                                 | -4.51                              | -0.05                                    | 0.20                                        | 24    | 20   | 39    | 2.485 | 0.15 |
| 16×Co-b                  | -76.17                        | -4.76                                 | -4.79                              | -0.05                                    | -0.08                                       | 24    | 20   | 48    | 2.513 | 0.15 |
| Dispersion mode c        |                               |                                       |                                    |                                          |                                             |       |      |       |       |      |
| 2×Co-c                   | -9.00                         | -4.50                                 | -4.29                              | 0.21                                     | 0.42                                        | 4     | 4    | -     | -     | 0.22 |
| 3×Co-c                   | -13.03                        | -4.34                                 | -4.03                              | 0.37                                     | 0.68                                        | 6     | 6    | -     | -     | 0.22 |
| 4×Co-c                   | -16.94                        | -4.24                                 | -3.91                              | 0.48                                     | 0.80                                        | 8     | 8    | -     | -     | 0.22 |
| 5×Co-c                   | -21.22                        | -4.24                                 | -4.28                              | 0.47                                     | 0.43                                        | 10    | 10   | 2     | 2.362 | 0.20 |
| Three-dimensional mode d |                               |                                       |                                    |                                          |                                             |       |      |       |       |      |
| 4×Co-d                   | -16.83                        | -4.21                                 | -3.29                              | 0.50                                     | 1.42                                        | 6     | 5    | 6     | 2.370 | 0.09 |
| 5×Co-d                   | -22.18                        | -4.44                                 | -5.35                              | 0.27                                     | -0.64                                       | 8     | 8    | 6     | 2.356 | 0.16 |
| 6×Co-d                   | -27.27                        | -4.55                                 | -5.09                              | 0.17                                     | -0.38                                       | 10    | 11   | 8     | 2.450 | 0.18 |
| 7×Co-d                   | -31.77                        | -4.54                                 | -4.50                              | 0.17                                     | 0.21                                        | 12    | 11   | 10    | 2.497 | 0.18 |

**Table S14.** Adsorption energy [ $E(\text{Ni}_{n/\text{ads}})$ ; eV], average adsorption energy [ $E(\text{Ni}_{\text{ads}/\text{av}})$ ; eV], stepwise adsorption energy [ $\Delta E(\text{Ni}_{\text{ads}})$ ; eV], average aggregation energy [ $E_{\text{agg}}(\text{Ni}_{\text{ads}})$ ; eV], stepwise growth energy [ $E_{\text{growth}}(\text{Ni}_{\text{ads}})$ ; eV], coordination number (CN) with surface Mo and C atoms, number of Ni-Ni bond (NB-Ni), average Ni-Ni distance ( $d$ , Å), and average Bader charge ( $q$ , e) for  $\text{Ni}_n$  on MoC(001).

| Species                  | $E(\text{Ni}_{n/\text{ads}})$ | $E(\text{Ni}_{\text{ads}/\text{av}})$ | $\Delta E(\text{Ni}_{\text{ads}})$ | $E_{\text{agg}}(\text{Ni}_{\text{ads}})$ | $E_{\text{growth}}(\text{Ni}_{\text{ads}})$ | CN-Mo | CN-C | NB-Ni | $d$   | $q$  |
|--------------------------|-------------------------------|---------------------------------------|------------------------------------|------------------------------------------|---------------------------------------------|-------|------|-------|-------|------|
| 1×Ni                     | -4.52                         | -4.52                                 | -4.52                              | –                                        | –                                           | 2     | 2    | –     | –     | 0.18 |
| Aggregation mode         |                               |                                       |                                    |                                          |                                             |       |      |       |       |      |
| 2×Ni                     | -8.71                         | -4.36                                 | -4.19                              | 0.16                                     | 0.33                                        | 4     | 4    | 1     | 2.405 | 0.15 |
| 3×Ni                     | -13.22                        | -4.41                                 | -4.51                              | 0.11                                     | 0.01                                        | 6     | 5    | 3     | 2.494 | 0.11 |
| 4×Ni                     | -17.55                        | -4.39                                 | -4.33                              | 0.13                                     | 0.19                                        | 8     | 6    | 5     | 2.503 | 0.09 |
| 5×Ni                     | -21.68                        | -4.34                                 | -4.13                              | 0.18                                     | 0.39                                        | 10    | 8    | 6     | 2.495 | 0.10 |
| Mode a                   |                               |                                       |                                    |                                          |                                             |       |      |       |       |      |
| 6×Ni-a                   | -25.93                        | -4.32                                 | -4.25                              | 0.20                                     | 0.27                                        | 12    | 9    | 8     | 2.495 | 0.08 |
| 7×Ni-a                   | -30.24                        | -4.32                                 | -4.31                              | 0.20                                     | 0.21                                        | 14    | 10   | 11    | 2.529 | 0.08 |
| 8×Ni-a                   | -34.81                        | -4.35                                 | -4.57                              | 0.17                                     | -0.05                                       | 16    | 12   | 14    | 2.573 | 0.08 |
| 9×Ni-a                   | -39.21                        | -4.36                                 | -4.40                              | 0.16                                     | 0.12                                        | 18    | 13   | 17    | 2.601 | 0.07 |
| Mode b                   |                               |                                       |                                    |                                          |                                             |       |      |       |       |      |
| 6×Ni-b                   | -25.90                        | -4.32                                 | -4.22                              | 0.20                                     | 0.30                                        | 12    | 10   | 8     | 2.568 | 0.10 |
| 7×Ni-b                   | -30.41                        | -4.34                                 | -4.51                              | 0.18                                     | 0.01                                        | 14    | 11   | 11    | 2.572 | 0.08 |
| 8×Ni-b                   | -34.81                        | -4.35                                 | -4.40                              | 0.17                                     | 0.12                                        | 16    | 12   | 14    | 2.574 | 0.08 |
| 9×Ni-b                   | -39.29                        | -4.37                                 | -4.48                              | 0.15                                     | 0.04                                        | 18    | 14   | 17    | 2.586 | 0.09 |
| Aggregation mode         |                               |                                       |                                    |                                          |                                             |       |      |       |       |      |
| 10×Ni                    | -43.89                        | -4.39                                 | -4.68                              | 0.13                                     | -0.16                                       | 20    | 14   | 21    | 2.555 | 0.07 |
| 11×Ni                    | -48.38                        | -4.40                                 | -4.49                              | 0.12                                     | 0.03                                        | 22    | 15   | 24    | 2.566 | 0.06 |
| 12×Ni                    | -53.08                        | -4.42                                 | -4.7                               | 0.10                                     | -0.18                                       | 24    | 16   | 28    | 2.553 | 0.06 |
| 13×Ni                    | -57.53                        | -4.43                                 | -4.45                              | 0.09                                     | 0.07                                        | 24    | 16   | 33    | 2.533 | 0.06 |
| 14×Ni                    | -61.95                        | -4.43                                 | -4.42                              | 0.09                                     | 0.10                                        | 24    | 16   | 36    | 2.505 | 0.05 |
| 15×Ni                    | -66.28                        | -4.42                                 | -4.33                              | 0.10                                     | 0.19                                        | 24    | 16   | 43    | 2.511 | 0.05 |
| 16×Ni                    | -70.48                        | -4.41                                 | -4.20                              | 0.11                                     | 0.32                                        | 24    | 16   | 48    | 2.509 | 0.05 |
| Dispersion mode c        |                               |                                       |                                    |                                          |                                             |       |      |       |       |      |
| 2×Ni-c                   | -8.60                         | -4.30                                 | -4.08                              | 0.22                                     | 0.44                                        | 4     | 4    | –     | –     | 0.19 |
| 3×Ni-c                   | -12.39                        | -4.13                                 | -3.79                              | 0.39                                     | 0.73                                        | 6     | 6    | –     | –     | 0.20 |
| 4×Ni-c                   | -16.14                        | -4.04                                 | -3.75                              | 0.48                                     | 0.77                                        | 8     | 8    | –     | –     | 0.20 |
| 5×Ni-c                   | -20.41                        | -4.08                                 | -4.27                              | 0.44                                     | 0.25                                        | 10    | 9    | 2     | 2.490 | 0.15 |
| Three-dimensional mode d |                               |                                       |                                    |                                          |                                             |       |      |       |       |      |
| 4×Ni-d                   | -16.55                        | -4.14                                 | -3.33                              | 0.38                                     | 1.19                                        | 6     | 5    | 6     | 2.424 | 0.06 |
| 5×Ni-d                   | -21.25                        | -4.25                                 | -4.70                              | 0.27                                     | -0.18                                       | 8     | 6    | 9     | 2.488 | 0.07 |
| 6×Ni-d                   | -25.29                        | -4.22                                 | -4.04                              | 0.31                                     | 0.48                                        | 10    | 8    | 10    | 2.456 | 0.08 |
| 7×Ni-d                   | -29.76                        | -4.25                                 | -4.47                              | 0.27                                     | 0.05                                        | 12    | 10   | 11    | 2.441 | 0.08 |

**Table S15.** Adsorption energy [ $E(\text{Cu}_n/\text{ads})$ ; eV] (values in parentheses corrected by D3 method), average adsorption energy [ $E(\text{Cu}_{\text{ads}/\text{av}})$ ; eV], stepwise adsorption energy [ $\Delta E(\text{Cu}_{\text{ads}})$ ; eV], average aggregation energy [ $E_{\text{agg}}(\text{Cu}_{\text{ads}})$ ; eV], stepwise growth energy [ $E_{\text{growth}}(\text{Cu}_{\text{ads}})$ ; eV], coordination number (CN) with surface Mo and C atoms, number of Cu-Cu bond (NB-Cu), average Cu-Cu distance ( $d$ , Å), and average Bader charge ( $q$ , e) for  $\text{Cu}_n$  on MoC(001).

| Species                    | $E(\text{Cu}_n/\text{ads})$ | $E(\text{Cu}_{\text{ads}/\text{av}})$ | $\Delta E(\text{Cu}_{\text{ads}})$ | $E_{\text{agg}}(\text{Cu}_{\text{ads}})$ | $E_{\text{growth}}(\text{Cu}_{\text{ads}})$ | CN-Mo | CN-C | NB-Cu | $d$   | $q$  |
|----------------------------|-----------------------------|---------------------------------------|------------------------------------|------------------------------------------|---------------------------------------------|-------|------|-------|-------|------|
| 1×Cu                       | -2.76                       | -2.76                                 | -2.76                              | –                                        | –                                           | 2     | 2    | –     | –     | 0.25 |
| Aggregation mode           |                             |                                       |                                    |                                          |                                             |       |      |       |       |      |
| 2×Cu                       | -5.82                       | -2.91                                 | -3.06                              | -0.15                                    | -0.30                                       | 4     | 2    | 1     | 2.362 | 0.11 |
| 3×Cu                       | -8.63                       | -2.88                                 | -2.81                              | -0.12                                    | -0.05                                       | 6     | 3    | 2     | 2.389 | 0.11 |
| Mode a                     |                             |                                       |                                    |                                          |                                             |       |      |       |       |      |
| 4×Cu-a                     | -11.80 (-8.10)              | -2.95                                 | -3.17                              | -0.19                                    | -0.41                                       | 9     | 4    | 4     | 2.478 | 0.08 |
| 5×Cu-a                     | -14.58                      | -2.92                                 | -2.78                              | -0.16                                    | -0.02                                       | 8     | 5    | 7     | 2.562 | 0.09 |
| 6×Cu-a                     | -17.65                      | -2.94                                 | -3.07                              | -0.18                                    | -0.31                                       | 8     | 6    | 10    | 2.575 | 0.09 |
| 7×Cu-a                     | -20.55                      | -2.94                                 | -2.90                              | -0.18                                    | -0.14                                       | 8     | 6    | 13    | 2.554 | 0.07 |
| 8×Cu-a                     | -23.44 (-21.75)             | -2.93                                 | -2.89                              | -0.17                                    | -0.13                                       | 8     | 6    | 16    | 2.549 | 0.05 |
| 9×Cu-a                     | -26.64                      | -2.96                                 | -3.20                              | -0.20                                    | -0.44                                       | 7     | 7    | 19    | 2.613 | 0.05 |
| 10×Cu-a                    | -29.93                      | -2.99                                 | -3.29                              | -0.23                                    | -0.53                                       | 15    | 8    | 21    | 2.555 | 0.06 |
| 11×Cu-a                    | -33.37                      | -3.03                                 | -3.44                              | -0.27                                    | -0.68                                       | 13    | 8    | 24    | 2.527 | 0.05 |
| 12×Cu-a                    | -37.14                      | -3.10                                 | -3.77                              | -0.34                                    | -1.01                                       | 11    | 8    | 27    | 2.506 | 0.04 |
| Mode b (Three-dimensional) |                             |                                       |                                    |                                          |                                             |       |      |       |       |      |
| 4×Cu-b                     | -11.66 (-7.79)              | -2.92                                 | -3.03                              | -0.16                                    | -0.27                                       | 6     | 3    | 6     | 2.494 | 0.09 |
| 5×Cu-b                     | -14.56                      | -2.91                                 | -2.90                              | -0.15                                    | -0.14                                       | 8     | 4    | 8     | 2.470 | 0.09 |
| 6×Cu-b                     | -17.57                      | -2.93                                 | -3.01                              | -0.17                                    | -0.25                                       | 10    | 5    | 10    | 2.544 | 0.08 |
| 7×Cu-b                     | -20.63                      | -2.95                                 | -3.06                              | -0.19                                    | -0.30                                       | 11    | 5    | 14    | 2.552 | 0.05 |
| 8×Cu-b                     | -24.01 (-22.27)             | -3.00                                 | -3.38                              | -0.24                                    | -0.62                                       | 12    | 6    | 15    | 2.517 | 0.05 |
| 9×Cu-b                     | -27.01                      | -3.00                                 | -3.00                              | -0.24                                    | -0.24                                       | 12    | 7    | 19    | 2.559 | 0.05 |
| 10×Cu-b                    | -30.21                      | -3.02                                 | -3.20                              | -0.26                                    | -0.44                                       | 12    | 7    | 22    | 2.558 | 0.04 |
| 11×Cu-b                    | -33.71                      | -3.06                                 | -3.50                              | -0.30                                    | -0.74                                       | 10    | 8    | 25    | 2.547 | 0.04 |
| 12×Cu-b                    | -36.92                      | -3.08                                 | -3.21                              | -0.32                                    | -0.45                                       | 12    | 8    | 24    | 2.508 | 0.04 |
| Aggregation mode           |                             |                                       |                                    |                                          |                                             |       |      |       |       |      |
| 13×Cu                      | -40.56                      | -3.12                                 | -3.42                              | -0.36                                    | -0.66                                       | 13    | 8    | 34    | 2.575 | 0.03 |
| 14×Cu                      | -44.44                      | -3.17                                 | -3.88                              | -0.41                                    | -1.12                                       | 15    | 8    | 37    | 2.557 | 0.02 |
| 15×Cu                      | -48.04                      | -3.20                                 | -3.60                              | -0.44                                    | -0.84                                       | 14    | 8    | 44    | 2.507 | 0.02 |
| Dispersion mode c          |                             |                                       |                                    |                                          |                                             |       |      |       |       |      |
| 2×Cu-c                     | -5.03 (-0.53)               | -2.52                                 | -2.27                              | 0.25                                     | 0.49                                        | 4     | 4    | –     | –     | 0.25 |
| 3×Cu-c                     | -6.98                       | -2.33                                 | -1.95                              | 0.43                                     | 0.81                                        | 6     | 6    | –     | –     | 0.25 |
| 4×Cu-c                     | -8.92 (-5.40)               | -2.23                                 | -1.94                              | 0.53                                     | 0.82                                        | 8     | 8    | –     | –     | 0.24 |
| 5×Cu-c                     | -14.08                      | -2.82                                 | -5.16                              | -0.06                                    | -2.40                                       | 10    | 5    | 5     | 2.512 | 0.09 |

**Table S16.** Adsorption energy [ $E(\text{Pd}_{n/\text{ads}})$ ; eV], average adsorption energy [ $E(\text{Pd}_{\text{ads}/\text{av}})$ ; eV], stepwise adsorption energy [ $\Delta E(\text{Pd}_{\text{ads}})$ ; eV], average aggregation energy [ $E_{\text{agg}}(\text{Pd}_{\text{ads}})$ ; eV], stepwise growth energy [ $E_{\text{growth}}(\text{Pd}_{\text{ads}})$ ; eV], coordination number (CN) with surface Mo and C atoms, number of Pd-Pd bond (NB-Pd), average Pd-Pd distance ( $d$ , Å), and average Bader charge ( $q$ , e) for  $\text{Pd}_n$  on  $\text{MoC}(001)$ .

| Species                  | $E(\text{Pd}_{n/\text{ads}})$ | $E(\text{Pd}_{\text{ads}/\text{av}})$ | $\Delta E(\text{Pd}_{\text{ads}})$ | $E_{\text{agg}}(\text{Pd}_{\text{ads}})$ | $E_{\text{growth}}(\text{Pd}_{\text{ads}})$ | CN-Mo | CN-C | NB-Pd | $d$   | $q$   |
|--------------------------|-------------------------------|---------------------------------------|------------------------------------|------------------------------------------|---------------------------------------------|-------|------|-------|-------|-------|
| 1×Pd                     | -8.95                         | -8.95                                 | -8.95                              | –                                        | –                                           | 0     | 1    | –     | –     | -0.05 |
| Aggregation mode         |                               |                                       |                                    |                                          |                                             |       |      |       |       |       |
| 2×Pd                     | -12.59                        | -6.30                                 | -3.64                              | 2.66                                     | 5.31                                        | 4     | 2    | 1     | 2.754 | -0.10 |
| 3×Pd                     | -15.87                        | -5.29                                 | -3.28                              | 3.66                                     | 5.67                                        | 7     | 3    | 2     | 2.747 | -0.09 |
| 4×Pd                     | -19.50                        | -4.88                                 | -3.63                              | 4.08                                     | 5.32                                        | 8     | 4    | 4     | 2.720 | -0.09 |
| 5×Pd                     | -23.23                        | -4.65                                 | -3.73                              | 4.30                                     | 5.22                                        | 7     | 5    | 6     | 2.770 | -0.09 |
| Mode a                   |                               |                                       |                                    |                                          |                                             |       |      |       |       |       |
| 6×Pd-a                   | -26.80                        | -4.47                                 | -3.57                              | 4.48                                     | 5.38                                        | 8     | 6    | 8     | 2.747 | -0.07 |
| 7×Pd-a                   | -29.64                        | -4.23                                 | -2.84                              | 4.72                                     | 6.11                                        | 7     | 6    | 10    | 2.739 | -0.08 |
| 8×Pd-a                   | -33.72                        | -4.22                                 | -4.08                              | 4.74                                     | 4.87                                        | 8     | 7    | 13    | 2.821 | -0.07 |
| 9×Pd-a                   | -37.93                        | -4.21                                 | -4.21                              | 4.74                                     | 4.74                                        | 8     | 8    | 16    | 2.837 | -0.06 |
| 10×Pd-a                  | -41.48                        | -4.15                                 | -3.55                              | 4.80                                     | 5.40                                        | 14    | 8    | 18    | 2.717 | -0.06 |
| 11×Pd-a                  | -44.89                        | -4.08                                 | -3.41                              | 4.87                                     | 5.54                                        | 13    | 8    | 25    | 2.757 | -0.06 |
| 12×Pd-a                  | -48.34                        | -4.03                                 | -3.45                              | 4.92                                     | 5.50                                        | 12    | 8    | 32    | 2.773 | -0.05 |
| 13×Pd-a                  | -51.77                        | -3.98                                 | -3.43                              | 4.97                                     | 5.52                                        | 14    | 8    | 36    | 2.789 | -0.05 |
| Mode b                   |                               |                                       |                                    |                                          |                                             |       |      |       |       |       |
| 6×Pd-b                   | -26.84                        | -4.47                                 | -3.61                              | 4.48                                     | 5.34                                        | 9     | 6    | 8     | 2.846 | -0.07 |
| 7×Pd-b                   | -30.57                        | -4.37                                 | -3.73                              | 4.58                                     | 5.22                                        | 8     | 7    | 10    | 2.850 | -0.07 |
| 8×Pd-b                   | -34.28                        | -4.29                                 | -3.71                              | 4.67                                     | 5.24                                        | 7     | 8    | 12    | 2.856 | -0.05 |
| 9×Pd-b                   | -37.93                        | -4.21                                 | -3.65                              | 4.74                                     | 5.30                                        | 8     | 8    | 16    | 2.837 | -0.06 |
| 10×Pd-b                  | -41.48                        | -4.15                                 | -3.55                              | 4.80                                     | 5.40                                        | 14    | 8    | 18    | 2.717 | -0.06 |
| 11×Pd-b                  | -44.89                        | -4.08                                 | -3.41                              | 4.87                                     | 5.54                                        | 13    | 8    | 25    | 2.757 | -0.06 |
| 12×Pd-b                  | -48.34                        | -4.03                                 | -3.45                              | 4.92                                     | 5.50                                        | 12    | 8    | 31    | 2.787 | -0.05 |
| 13×Pd-b                  | -51.78                        | -3.98                                 | -3.44                              | 4.97                                     | 5.51                                        | 7     | 8    | 37    | 2.798 | -0.06 |
| Dispersion mode c        |                               |                                       |                                    |                                          |                                             |       |      |       |       |       |
| 2×Pd-c                   | -11.94                        | -5.97                                 | -2.99                              | 2.98                                     | 5.96                                        | 0     | 2    | 0     | –     | -0.06 |
| 3×Pd-c                   | -16.03                        | -5.34                                 | -4.09                              | 3.61                                     | 4.86                                        | 7     | 3    | 2     | 2.734 | -0.12 |
| Three-dimensional mode d |                               |                                       |                                    |                                          |                                             |       |      |       |       |       |
| 4×Pd-d                   | -18.78                        | -4.70                                 | -2.91                              | 4.26                                     | 6.04                                        | 8     | 3    | 5     | 2.695 | -0.09 |
| 5×Pd-d                   | -22.60                        | -4.52                                 | -3.82                              | 4.43                                     | 5.13                                        | 6     | 4    | 8     | 2.755 | -0.07 |
| 6×Pd-d                   | -26.32                        | -4.39                                 | -3.72                              | 4.56                                     | 5.23                                        | 9     | 5    | 10    | 2.774 | -0.07 |
| 7×Pd-d                   | -30.08                        | -4.30                                 | -3.76                              | 4.65                                     | 5.19                                        | 10    | 6    | 12    | 2.818 | -0.08 |

**Table S17.** Adsorption energy [ $E(\text{Pt}_{n/\text{ads}})$ ; eV] (values in parentheses corrected by D3 method), average adsorption energy [ $E(\text{Pt}_{\text{ads}/\text{av}})$ ; eV], stepwise adsorption energy [ $\Delta E(\text{Pt}_{\text{ads}})$ ; eV], average aggregation energy [ $E_{\text{agg}}(\text{Pt}_{\text{ads}})$ ; eV], stepwise growth energy [ $E_{\text{growth}}(\text{Pt}_{\text{ads}})$ ; eV], coordination number (CN) with surface Mo and C atoms, number of Pt-Pt bond (NB-Pt), average Pt-Pt distance ( $d$ , Å), and average Bader charge ( $q$ , e) for  $\text{Pt}_n$  on  $\text{MoC}(001)$ .

| Species                  | $E(\text{Pt}_{n/\text{ads}})$ | $E(\text{Pt}_{\text{ads}/\text{av}})$ | $\Delta E(\text{Pt}_{\text{ads}})$ | $E_{\text{agg}}(\text{Pt}_{\text{ads}})$ | $E_{\text{growth}}(\text{Pt}_{\text{ads}})$ | CN-Mo | CN-C | NB-Pt | $d$   | $q$   |
|--------------------------|-------------------------------|---------------------------------------|------------------------------------|------------------------------------------|---------------------------------------------|-------|------|-------|-------|-------|
| 1×Pt                     | -10.50                        | -10.50                                | -10.50                             | -                                        | -                                           | 0     | 1    | -     | -     | -0.27 |
| Aggregation mode         |                               |                                       |                                    |                                          |                                             |       |      |       |       |       |
| 2×Pt                     | -15.80(-11.60)                | -7.90                                 | -5.30                              | 2.60                                     | 5.20                                        | 4     | 2    | 1     | 2.660 | -0.26 |
| 3×Pt                     | -21.00                        | -7.00                                 | -5.20                              | 3.50                                     | 5.30                                        | 4     | 3    | 2     | 2.636 | -0.23 |
| 4×Pt                     | -26.18(-23.38)                | -6.55                                 | -5.18                              | 3.96                                     | 5.32                                        | 2     | 4    | 4     | 2.704 | -0.25 |
| 5×Pt                     | -31.42                        | -6.28                                 | -5.24                              | 4.22                                     | 5.26                                        | 5     | 5    | 6     | 2.696 | -0.14 |
| 6×Pt                     | -36.73(-35.26)                | -6.12                                 | -5.31                              | 4.38                                     | 5.19                                        | 4     | 6    | 8     | 2.679 | -0.14 |
| 7×Pt                     | -41.98                        | -6.00                                 | -5.25                              | 4.50                                     | 5.25                                        | 8     | 6    | 10    | 2.751 | -0.12 |
| Mode a                   |                               |                                       |                                    |                                          |                                             |       |      |       |       |       |
| 8×Pt-a                   | -47.58                        | -5.95                                 | -5.60                              | 4.55                                     | 4.90                                        | 6     | 7    | 13    | 2.703 | -0.11 |
| 9×Pt-a                   | -53.21                        | -5.91                                 | -5.63                              | 4.59                                     | 4.87                                        | 8     | 7    | 16    | 2.679 | -0.11 |
| 10×Pt-a                  | -59.04                        | -5.90                                 | -5.83                              | 4.60                                     | 4.67                                        | 8     | 8    | 18    | 2.685 | -0.11 |
| 11×Pt-a                  | -64.76                        | -5.89                                 | -5.72                              | 4.61                                     | 4.78                                        | 8     | 7    | 21    | 2.636 | -0.10 |
| 12×Pt-a                  | -70.34                        | -5.86                                 | -5.58                              | 4.64                                     | 4.92                                        | 8     | 7    | 31    | 2.679 | -0.09 |
| 13×Pt-a                  | -74.91                        | -5.76                                 | -4.57                              | 4.74                                     | 5.93                                        | 10    | 7    | 32    | 2.676 | -0.09 |
| 14×Pt-a                  | -79.84                        | -5.70                                 | -4.93                              | 4.80                                     | 5.57                                        | 7     | 7    | 37    | 2.711 | -0.08 |
| Mode b                   |                               |                                       |                                    |                                          |                                             |       |      |       |       |       |
| 8×Pt-b                   | -47.68(-47.78)                | -5.96                                 | -5.70                              | 4.54                                     | 4.80                                        | 9     | 7    | 14    | 2.718 | -0.12 |
| 9×Pt-b                   | -53.21                        | -5.91                                 | -5.53                              | 4.59                                     | 4.97                                        | 8     | 7    | 16    | 2.679 | -0.12 |
| 10×Pt-b                  | -59.17                        | -5.92                                 | -5.96                              | 4.58                                     | 4.54                                        | 8     | 8    | 17    | 2.718 | -0.11 |
| 11×Pt-b                  | -64.79                        | -5.89                                 | -5.62                              | 4.61                                     | 4.88                                        | 10    | 8    | 23    | 2.672 | -0.10 |
| 12×Pt-b                  | -70.17                        | -5.85                                 | -5.38                              | 4.65                                     | 5.12                                        | 7     | 8    | 32    | 2.695 | -0.09 |
| 13×Pt-b                  | -75.10                        | -5.78                                 | -4.93                              | 4.72                                     | 5.57                                        | 8     | 8    | 36    | 2.740 | -0.07 |
| 14×Pt-b                  | -80.32                        | -5.74                                 | -5.22                              | 4.76                                     | 5.28                                        | 6     | 8    | 39    | 2.735 | -0.07 |
| Dispersed mode c         |                               |                                       |                                    |                                          |                                             |       |      |       |       |       |
| 2×Pt-c                   | -14.84(-10.66)                | -7.42                                 | -4.34                              | 3.08                                     | 6.16                                        | 6     | 2    | 0     | -     | -0.31 |
| 3×Pt-c                   | -19.62                        | -6.54                                 | -4.78                              | 3.96                                     | 5.72                                        | 6     | 3    | 2     | 2.859 | -0.21 |
| Three-dimensional mode d |                               |                                       |                                    |                                          |                                             |       |      |       |       |       |
| 4×Pt-d                   | -25.66                        | -6.42                                 | -5.00                              | 4.09                                     | 5.50                                        | 5     | 3    | 5     | 2.683 | -0.21 |
| 5×Pt-d                   | -30.67(-28.35)                | -6.13                                 | -5.01                              | 4.37                                     | 5.49                                        | 5     | 4    | 9     | 2.787 | -0.17 |
| 6×Pt-d                   | -36.21                        | -6.04                                 | -5.54                              | 4.47                                     | 4.96                                        | 6     | 5    | 10    | 2.739 | -0.15 |
| 7×Pt-d                   | -41.59                        | -5.94                                 | -5.38                              | 4.56                                     | 5.12                                        | 6     | 6    | 11    | 2.733 | -0.13 |

**Table S18.** Comparison of lattice constants of  $\text{Mo}_x\text{C}_y$  and bulk metals.

| Bulk                  | Phase | Theory              | Experiment          |
|-----------------------|-------|---------------------|---------------------|
| $\text{Mo}_2\text{C}$ | hcp   | 3.040               | 3.002 <sup>23</sup> |
| $\delta\text{-MoC}$   | fcc   | 4.360               | 4.278 <sup>24</sup> |
| Co                    | fcc   | 3.53 <sup>25</sup>  | 3.55 <sup>26</sup>  |
| Co                    | hcp   | 3.521 <sup>27</sup> | 3.545 <sup>28</sup> |
| Ni                    | fcc   | 3.52 <sup>29</sup>  | 3.524 <sup>30</sup> |
| Cu                    | fcc   | 3.637 <sup>31</sup> | 3.610 <sup>32</sup> |
| Pd                    | fcc   | 3.95 <sup>33</sup>  | 3.89 <sup>34</sup>  |
| Pt                    | fcc   | 4.00 <sup>35</sup>  | 3.912 <sup>36</sup> |

## Reference

1. M. Castro, C. Jamorski and D. R. Salahub, *Chem. Phys. Lett.*, 1997, **271**, 133.
2. S. Datta, M. Kabir, S. Ganguly, B. Sanyal, T. Saha-Dasgupta and A. Mookerjee, *Phys Rev B*, 2007, **76**, 014429.
3. L. M. Russon, S. A. Heidecke, M. K. Birke, J. Conceicao, M. D. Morse and P. Armentrout, *J. Chem. Phys.*, 1994, **100**, 4747.
4. J. Bucher, D. Douglass and L. Bloomfield, *Phys. Rev. Lett.*, 1991, **66**, 3052.
5. M. Michelini, R. Pis Diez and A. Jubert, *Int. J. Quantum Chem.*, 1998, **70**, 693.
6. M. D. Morse, *Chem. Rev.*, 1986, **86**, 1049.
7. M. Morse, G. Hansen, P. Langridge-Smith, L.S. Zheng, M. Geusic, D. Michalopoulos and R. Smalley, *J. Chem. Phys.*, 1984, **80**, 5400.
8. M. Michelini, R. P. Diez and A. Jubert, *J. Mol. Struct.*, 1999, **490**, 181.
9. V. A. Spasov, T.-H. Lee and K. M. Ervin, *J. Chem. Phys.*, 2000, **112**, 1713.
10. P. Jaque and A. Toro-Labbé, *J. Chem. Phys.*, 2002, **117**, 3208.
11. K. Jug, B. Zimmermann, P. Calaminici and A. M. Köster, *J. Chem. Phys.*, 2002, **116**, 4497.
12. C. Massobrio, A. Pasquarello and A. Dal Corso, *J. Chem. Phys.*, 1998, **109**, 6626.
13. X.-j. Kuang, X.-q. Wang and G.-b. Liu, *Transition Met. Chem.*, 2010, **35**, 841.
14. X. Tian, T. Wang, Y. Yang, Y.-W. Li, J. Wang and H. Jiao, *J. Phys. Chem. C*, 2014, **118**, 21963.
15. M. Kabir, A. Mookerjee and A. Bhattacharya, *Phys Rev A*, 2004, **69**, 043203.
16. Q. Cui, D.G. Musaev and K. Morokuma, *J. Chem. Phys.*, 1998, **108**, 8418.
17. A. V. Matveev, K. M. Neyman, G. Pacchioni and N. Rösch, *Chem. Phys. Lett.*, 1999, **299**, 603.
18. S. Krüger, S. Vent, F. Nörtemann, M. Staufer and N. Rösch, *J. Chem. Phys.*, 2001, **115**, 2082.
19. Y. He, P. Zhao, W. Guo, Y. Yang, C.-F. Huo, Y.-W. Li and X.-D. Wen, *Catal. Sci. Technol.*, 2016, **6**, 6726.
20. K. Bhattacharyya and C. Majumder, *Chem. Phys. Lett.*, 2007, **446**, 374.
21. A. Nie, J. Wu, C. Zhou, S. Yao, C. Luo, R. C. Forrey and H. Cheng, *Int. J. Quantum Chem.*, 2007, **107**, 219.
22. L. Xiao and L. Wang, *J. Phys. Chem. A*, 2004, **108**, 8605.
23. R. Fries and C. P. Kempster, *Anal. Chem.*, 1960, **32**, 1898.
24. A. Fernández Guillermet, J. Häglund and G. Grimvall, *Phys Rev B*, 1992, **45**, 11557.
25. C. Chen, Q. Wang, G. Wang, B. Hou, L. Jia and D. Li, *J. Phys. Chem. C*, 2016, **120**, 9132.
26. N. W. Ashcroft and N. D. Mermin, *Solid State Physics*, Holt, Rinehart and Winston: New York. 1976, p. 70.
27. W. Luo and A. Asthagiri, *J. Phys. Chem. C*, 2014, **118**, 15274.
28. F. Illas, *J. Chem. Phys.*, 2010, **133**, 024701.
29. M. Pozzo, G. Carlini, R. Rosei and D. Alfè, *J. Chem. Phys.*, 2007, **126**, 164706.
30. D. R. Lide, *CRC handbook of chemistry and physics*, 83th ed., CRC press, New York, 2004.
31. G. Gajewski and C.-W. Pao, *J. Chem. Phys.*, 2011, **135**, 064707.
32. P. Villars and L. Calvert, *American Society of Metals, Cleveland, OH*, 1985.
33. V. Vorotnikov, G. Mpourmpakis and D. G. Vlachos, *ACS Catal.*, 2012, **2**, 2496.
34. R. Lamber, S. Wetjen and N. I. Jaeger, *Phys Rev B*, 1995, **51**, 10968.
35. J. Scaranto and M. Mavrikakis, *Surf. Sci.*, 2016, **648**, 201.
36. P. H. Howard, *Handbook of physical properties of organic chemicals*, CRC press, 1996.
